# Supplementary material for: Maturation Selection Biases and Relative Age Effect in Italian Soccer Players of Different Levels
Source: MDPI journal article supplement (doi:10.3390/biology11111559), 2022-10-24
Supplement: s1 [file s1]

**Table S2.** Variables mean comparisons and interaction effects of Maturity Status, Teams and RAE in U13 soccer players.

|                                 | U13 Bologna         |                     |                     | U13 Russi           |                     |                     |                 |                        |              | U13 Bologna         |                     |                     |                     | U13 Russi           |                     |                     |                     |                 |                        |                    |
|---------------------------------|---------------------|---------------------|---------------------|---------------------|---------------------|---------------------|-----------------|------------------------|--------------|---------------------|---------------------|---------------------|---------------------|---------------------|---------------------|---------------------|---------------------|-----------------|------------------------|--------------------|
|                                 | E<br>(n=7)          | OT<br>(n=9)         | L<br>(n=11)         | E<br>(n=2)          | OT<br>(n=8)         | L<br>(n=2)          | Bo-<br>Ru       | MS                     | team<br>s*MS | Q1<br>(n=12)        | Q2<br>(n=5)         | Q3<br>(n=8)         | Q4<br>(n=2)         | Q1<br>(n=3)         | Q2<br>(n=3)         | Q3<br>(n=2)         | Q4<br>(n=4)         | Bo-<br>Ru       | RA<br>E                | team<br>s*RA<br>E  |
|                                 | Mean<br>( $\pm$ SD) | F (1,<br>37)    | F (2,<br>36)           | F (5,<br>33) | Mean<br>( $\pm$ SD) | F (1,<br>36)    | F (3,<br>34)           | F (7, 30)          |
| Weight (Kg)                     | 50.14<br>(6.77)     | 43.44<br>(4.25)     | 40.27<br>(3.82)     | 47.50<br>(7.07)     | 51.88<br>(5.36)     | 35.50<br>(9.19)     | 0.0<br>26       | 9.8<br>69 <sup>†</sup> | 5.063<br>*   | 42.58<br>(4.72)     | 48.00<br>(8.80)     | 43.63<br>(6.63)     | 42.50<br>(3.54)     | 49.00<br>(3.50)     | 57.17<br>(4.07)     | 48.50<br>(3.54)     | 41.38<br>(9.45)     | 4.1<br>08*      | 3.3<br>21*             | 0.735              |
| Height (cm)                     | 162.63<br>(7.41)    | 156.7<br>(4.51)     | 148.66<br>(3.81)    | 162.80<br>(7.64)    | 155.44<br>(5.35)    | 138.85<br>(9.83)    | 2.6<br>90       | 650<br>+               | 1.778        | 154.72<br>(6.51)    | 158.12<br>(10.69)   | 153.69<br>(8.00)    | 153.65<br>(8.56)    | 162.90<br>(6.68)    | 157.17<br>(3.04)    | 151.00<br>(2.26)    | 146.15<br>(10.66)   | 0.0<br>61       | 2.0<br>16              | 1.346              |
| Trunk<br>Height (cm)            | 81.66<br>(2.82)     | 78.11<br>(1.55)     | 74.36<br>(2.05)     | 83.00<br>(0.57)     | 78.91<br>(1.48)     | 69.95<br>(3.32)     | 0.8<br>53       | 778<br>+               | 4.619<br>*   | 77.67<br>(3.00)     | 77.72<br>(4.32)     | 77.20<br>(4.43)     | 77.20<br>(5.37)     | 81.90<br>(1.41)     | 78.33<br>(0.57)     | 78.30<br>(0.28)     | 74.98<br>(6.47)     | 0.3<br>93       | 1.0<br>85              | 0.837              |
| Leg length<br>(cm)              | 80.97<br>(6.6)      | 78.59<br>(3.99)     | 74.30<br>(3.53)     | 79.80<br>(7.07)     | 76.53<br>(4.44)     | 68.90<br>(6.51)     | 2.2<br>53       | 6.0<br>57 <sup>†</sup> | 0.392        | 77.05<br>(4.54)     | 80.40<br>(8.53)     | 76.49<br>(4.44)     | 76.45<br>(3.18)     | 81.00<br>(5.41)     | 78.83<br>(3.07)     | 72.70<br>(1.98)     | 71.18<br>(4.71)     | 0.7<br>31       | 2.2<br>91              | 1.221              |
| BMI (kg/m <sup>2</sup> )        | 18.93<br>(1.99)     | 17.66<br>(1.04)     | 18.21<br>(1.48)     | 17.86<br>(0.99)     | 21.52<br>(2.50)     | 18.21<br>(2.18)     | 1.6<br>83       | 1.9<br>74              | 5.744<br>†   | 17.78<br>(1.52)     | 19.09<br>(2.21)     | 18.38<br>(1.14)     | 18.00<br>(0.51)     | 18.46<br>(0.44)     | 23.17<br>(1.98)     | 21.30<br>(2.19)     | 19.21<br>(3.02)     | 130<br>†        | 4.6<br>61 <sup>†</sup> | 1.559              |
| Relaxed<br>arm circ.<br>(cm)    | 22.27<br>(1.6)      | 21.30<br>(1.30)     | 20.45<br>(1.47)     | 21.70<br>(1.13)     | 24.88<br>(1.81)     | 21.35<br>(1.63)     | 4.4<br>38*      | 5.1<br>92 <sup>†</sup> | 4.855<br>†   | 20.68<br>(1.47)     | 22.04<br>(2.13)     | 21.68<br>(1.32)     | 20.40<br>(0.85)     | 22.33<br>(0.47)     | 26.13<br>(0.90)     | 24.95<br>(0.78)     | 22.45<br>(2.68)     | 20.<br>687<br>† | 5.0<br>54 <sup>†</sup> | 0.958              |
| Contracted<br>arm circ.<br>(cm) | 24.57<br>(1.74)     | 23.37<br>(1.37)     | 22.30<br>(1.59)     | 23.85<br>(1.63)     | 26.26<br>(1.69)     | 23.40<br>(2.12)     | 2.8<br>11       | 3.5<br>98*             | 3.040        | 22.81<br>(1.81)     | 23.96<br>(2.13)     | 23.68<br>(1.62)     | 22.35<br>(0.64)     | 24.57<br>(0.67)     | 27.53<br>(1.34)     | 25.60<br>(0.99)     | 24.28<br>(2.55)     | 11.<br>486<br>† | 2.6<br>51              | 0.439              |
| Calf circ.<br>(cm)              | 33.56<br>(3.24)     | 30.43<br>(5.73)     | 29.69<br>(1.90)     | 32.65<br>(1.91)     | 34.36<br>(1.26)     | 29.40<br>(1.56)     | 0.4<br>42       | 2.2<br>10              | 1.646        | 30.77<br>(4.18)     | 31.90<br>(2.98)     | 29.49<br>(3.92)     | 35.40<br>(5.66)     | 33.67<br>(0.31)     | 35.17<br>(1.69)     | 34.00<br>(1.27)     | 31.13<br>(2.53)     | 1.3<br>87       | 0.3<br>91              | 1.771              |
| Thigh circ.<br>(cm)             | 42.40<br>(6.31)     | 40.11<br>(3.25)     | 40.45<br>(1.96)     | 43.65<br>(1.77)     | 48.54<br>(2.93)     | 42.00<br>(4.81)     | 6.3<br>17*      | 1.7<br>42              | 3.345<br>*   | 40.30<br>(3.19)     | 44.00<br>(3.18)     | 41.20<br>(2.31)     | 34.80<br>(8.20)     | 45.07<br>(1.26)     | 50.43<br>(1.76)     | 47.25<br>(0.64)     | 44.65<br>(5.75)     | 26.<br>744<br>† | 5.3<br>24 <sup>†</sup> | 0.634              |
| Humeral<br>diameter<br>(mm)     | 6.33<br>(0.43)      | 6.16<br>(0.28)      | 5.94<br>(0.22)      | 6.25<br>(0.07)      | 6.21<br>(0.42)      | 5.35<br>(0.49)      | 2.2<br>55       | 7.8<br>32 <sup>†</sup> | 2.256        | 6.08<br>(0.38)      | 6.04<br>(0.36)      | 6.19<br>(0.25)      | 6.15<br>(0.49)      | 6.13<br>(0.50)      | 6.33<br>(0.25)      | 5.90<br>(0.28)      | 5.93<br>(0.74)      | 0.0<br>74       | 0.1<br>95              | 0.730              |
| Femoral<br>diameter<br>(mm)     | 8.97<br>(0.55)      | 8.56<br>(0.49)      | 8.42<br>(0.41)      | 7.65<br>(1.77)      | 9.45<br>(0.49)      | 8.35<br>(0.78)      | 0.5<br>11       | 4.8<br>37*             | 8.819<br>†   | 8.55<br>(0.47)      | 8.74<br>(0.59)      | 8.64<br>(0.60)      | 8.50<br>(0.42)      | 9.40<br>(0.78)      | 9.60<br>(0.10)      | 9.15<br>(0.64)      | 8.08<br>(1.27)      | 3.3<br>00       | 2.0<br>51              | 1.318              |
| Triceps SK<br>(mm)              | 7.43<br>(1.43)      | 8.06<br>(1.94)      | 8.91<br>(1.30)      | 6.50<br>(0.71)      | 12.38<br>(3.54)     | 11.00<br>(4.24)     | 4.0<br>71       | 4.9<br>84*             | 3.207        | 8.38<br>(1.61)      | 8.10<br>(2.30)      | 8.31<br>(1.58)      | 7.50<br>(0.71)      | 7.67<br>(1.53)      | 12.33<br>(3.06)     | 15.00<br>(4.24)     | 11.00<br>(4.08)     | 15.<br>762<br>† | 3.5<br>40*             | 3.764<br>*         |
| Biceps SK<br>(mm)               | 4.14<br>(0.94)      | 4.83<br>(1.37)      | 4.86<br>(1.63)      | 4.25<br>(0.35)      | 8.44<br>(3.35)      | 7.00<br>(2.83)      | 5.7<br>40*      | 3.3<br>41*             | 1.762        | 4.63<br>(1.48)      | 4.40<br>(1.39)      | 5.13<br>(1.36)      | 3.75<br>(1.06)      | 4.00<br>(1.00)      | 9.17<br>(2.47)      | 11.00<br>(2.83)     | 7.13<br>(2.78)      | 26.<br>243<br>† | 6.9<br>01 <sup>†</sup> | 5.760 <sup>†</sup> |
| Subscapular<br>SK (mm)          | 6.29<br>(0.99)      | 4.94<br>(0.39)      | 5.23<br>(0.85)      | 6.25<br>(1.06)      | 9.81<br>(3.52)      | 7.50<br>(2.12)      | 10.<br>599<br>† | 1.2<br>81              | 4.552<br>*   | 5.04<br>(0.54)      | 5.90<br>(1.14)      | 5.69<br>(1.19)      | 5.25<br>(0.35)      | 6.33<br>(0.58)      | 11.67<br>(4.73)     | 10.25<br>(1.06)     | 7.88<br>(2.59)      | 31.<br>771<br>† | 5.6<br>62 <sup>†</sup> | 2.927<br>*         |

|                      |                   |                   |                   |                   |                   |                   |                 |            |            |                   |                   |                   |                   |                  |                   |                  |                  |                 |            |            |
|----------------------|-------------------|-------------------|-------------------|-------------------|-------------------|-------------------|-----------------|------------|------------|-------------------|-------------------|-------------------|-------------------|------------------|-------------------|------------------|------------------|-----------------|------------|------------|
| Supraspinal SK (mm)  | 5.29<br>(0.91)    | 4.67<br>(1.25)    | 4.64<br>(1.19)    | 5.00<br>(1.41)    | 9.63<br>(4.27)    | 7.75<br>(2.47)    | 8.1<br>27†      | 1.8<br>87  | 3.107      | 4.63<br>(1.00)    | 5.20<br>(1.25)    | 5.00<br>(1.41)    | 4.25<br>(0.35)    | 5.00<br>(1.00)   | 11.33<br>(4.04)   | 9.50<br>(2.12)   | 8.63<br>(4.82)   | 22.<br>483<br>† | 3.9<br>97* | 2.876      |
| Suprailiac SK (mm)   | 7.93<br>(1.79)    | 6.72<br>(2.08)    | 7.45<br>(1.75)    | 8.50<br>(0.71)    | 12.63<br>(4.37)   | 11.75<br>(4.6)    | 10.<br>850<br>† | 0.7<br>03  | 2.226      | 6.92<br>(1.84)    | 8.20<br>(2.28)    | 7.50<br>(1.85)    | 7.00<br>(1.41)    | 7.67<br>(1.15)   | 14.67<br>(3.51)   | 12.50<br>(2.12)  | 12.38<br>(4.92)  | 21.<br>862<br>† | 4.1<br>84† | 2.238      |
| Thigh SK (mm)        | 8.43<br>(1.27)    | 9.33<br>(1.41)    | 11.05<br>(1.52)   | 9.00<br>(1.00)    | 13.50<br>(4.00)   | 11.00<br>(4.24)   | 2.7<br>63       | 3.1<br>18  | 2.629      | 9.83<br>(1.80)    | 9.50<br>(1.87)    | 10.13<br>(1.73)   | 9.00<br>(2.83)    | 8.33<br>(1.15)   | 14.67<br>(2.52)   | 15.50<br>(3.54)  | 12.00<br>(4.24)  | 12.<br>055<br>† | 4.2<br>76† | 4.203†     |
| Medial Calf SK (mm)  | 6.79<br>(1.29)    | 6.33<br>(1.64)    | 7.73<br>(2.41)    | 6.50<br>(0.71)    | 10.81<br>(2.42)   | 8.00<br>(1.41)    | 3.3<br>65       | 2.1<br>26  | 4.593<br>* | 7.08<br>(2.04)    | 7.20<br>(1.64)    | 7.06<br>(2.41)    | 6.00<br>(1.10)    | 7.50<br>(0.87)   | 11.00<br>(1.73)   | 12.50<br>(2.12)  | 8.75<br>(3.10)   | 14.<br>846<br>† | 2.4<br>78  | 1.991      |
| Lateral Calf SK (mm) | 7.14<br>(1.65)    | 7.11<br>(1.02)    | 8.27<br>(2.23)    | 7.50<br>(0.71)    | 11.00<br>(2.62)   | 8.75<br>(2.47)    | 3.8<br>81       | 1.7<br>54  | 2.830      | 7.88<br>(1.92)    | 7.20<br>(1.92)    | 7.75<br>(1.77)    | 6.25<br>(0.35)    | 7.67<br>(0.58)   | 12.00<br>(1.73)   | 11.50<br>(2.12)  | 9.63<br>(3.35)   | 14.<br>961<br>† | 1.9<br>37  | 2.611      |
| TUA (cm²)            | 39.67<br>(5.7)    | 36.24<br>(4.55)   | 33.44<br>(4.75)   | 37.54<br>(3.91)   | 49.49<br>(7.01)   | 36.40<br>(5.53)   | 4.5<br>66*      | 5.5<br>01† | 5.388<br>† | 34.19<br>(4.78)   | 38.97<br>(7.42)   | 37.53<br>(4.72)   | 33.16<br>(2.76)   | 39.72<br>(1.67)  | 54.42<br>(3.69)   | 49.59<br>(3.09)  | 40.56<br>(9.95)  | 22.<br>372<br>† | 5.6<br>52† | 1.266      |
| UMA (cm²)            | 31.63<br>(5.22)   | 28.78<br>(4.43)   | 26.54<br>(4.45)   | 29.43<br>(3.24)   | 42.31<br>(7.23)   | 29.85<br>(6.31)   | 5.1<br>45*      | 5.3<br>48† | 5.795<br>† | 27.05<br>(4.42)   | 31.25<br>(6.97)   | 29.98<br>(4.18)   | 25.85<br>(2.23)   | 31.73<br>(1.27)  | 46.77<br>(3.49)   | 43.32<br>(4.46)  | 33.72<br>(10.29) | 25.<br>371<br>† | 6.0<br>44† | 1.708      |
| UFA (cm²)            | 8.03<br>(0.66)    | 7.46<br>(0.52)    | 6.90<br>(0.43)    | 8.12<br>(0.66)    | 7.19<br>(1.10)    | 6.54<br>(0.78)    | 0.4<br>26       | 6.1<br>14† | 0.194      | 7.14<br>(0.60)    | 7.72<br>(0.84)    | 7.55<br>(0.73)    | 7.31<br>(0.53)    | 8.00<br>(0.61)   | 7.64<br>(1.26)    | 6.27<br>(1.37)   | 6.84<br>(0.70)   | 0.7<br>04       | 1.6<br>88  | 2.629      |
| UFI (%)              | 20.46<br>(2.04)   | 20.81<br>(2.39)   | 20.92<br>(2.33)   | 21.64<br>(0.48)   | 14.86<br>(3.45)   | 18.35<br>(4.92)   | 5.1<br>85*      | 3.6<br>65* | 4.301<br>* | 21.14<br>(2.34)   | 20.20<br>(3.05)   | 20.21<br>(1.68)   | 22.06<br>(0.25)   | 20.12<br>(1.03)  | 14.05<br>(2.11)   | 12.75<br>(3.56)  | 17.70<br>(4.98)  | 22.<br>356<br>† | 4.4<br>74† | 2.306      |
| TCA (cm²)            | 90.37<br>(18.00)  | 76.07<br>(29.79)  | 70.45<br>(8.85)   | 85.02<br>(9.93)   | 94.12<br>(6.96)   | 68.91<br>(7.28)   | 0.2<br>72       | 2.2<br>24  | 1.368      | 76.64<br>(23.29)  | 81.59<br>(15.27)  | 70.30<br>(16.98)  | 101.05<br>(31.89) | 90.25<br>(1.64)  | 98.61<br>(9.39)   | 92.10<br>(6.89)  | 77.51<br>(12.65) | 1.0<br>46       | 0.3<br>80  | 1.790      |
| CMA (cm²)            | 68.51<br>(15.75)  | 56.94<br>(25.19)  | 48.64<br>(6.66)   | 63.64<br>(6.59)   | 60.38<br>(5.51)   | 46.4<br>(1.29)    | 0.0<br>42       | 2.6<br>19  | 0.214      | 55.3<br>(19.79)   | 60.02<br>(9.85)   | 50.30<br>(15.54)  | 80.49<br>(27.86)  | 66.53<br>(2.04)  | 62.25<br>(5.14)   | 55.76<br>(0.25)  | 51.32<br>(6.15)  | 0.1<br>91       | 0.7<br>24  | 2.104      |
| CFA (cm²)            | 21.86<br>(5.09)   | 19.12<br>(5.88)   | 21.81<br>(6.60)   | 21.38<br>(3.33)   | 33.74<br>(7.79)   | 22.51<br>(6.00)   | 3.6<br>89       | 1.8<br>72  | 4.761<br>* | 21.34<br>(6.39)   | 21.57<br>(6.71)   | 20.00<br>(6.04)   | 20.55<br>(4.02)   | 23.72<br>(1.87)  | 36.37<br>(6.45)   | 36.34<br>(7.14)  | 26.19<br>(10.42) | 14.<br>958<br>† | 1.8<br>48  | 2.032      |
| CFI (%)              | 24.41<br>(4.57)   | 26.34<br>(5.96)   | 30.65<br>(7.10)   | 25.08<br>(0.99)   | 35.64<br>(6.69)   | 32.39<br>(5.28)   | 2.4<br>50       | 2.6<br>66  | 1.582      | 28.18<br>(6.31)   | 26.16<br>(4.31)   | 29.33<br>(8.02)   | 20.75<br>(2.57)   | 26.28<br>(1.98)  | 36.75<br>(3.79)   | 39.28<br>(4.81)  | 33.09<br>(8.31)  | 10.<br>357<br>† | 2.1<br>54  | 2.219      |
| TTA (cm²)            | 145.85<br>(38.14) | 128.84<br>(19.66) | 130.58<br>(13.17) | 151.82<br>(12.29) | 188.17<br>(22.61) | 141.37<br>(32.16) | 7.0<br>96*      | 2.2<br>59  | 4.297<br>* | 130.05<br>(19.92) | 154.78<br>(22.18) | 135.52<br>(15.61) | 99.10<br>(45.45)  | 161.79<br>(9.05) | 202.67<br>(14.01) | 177.77<br>(4.79) | 160.7<br>(41.85) | 28.<br>164<br>† | 5.4<br>17† | 0.523      |
| TMA (cm²)            | 130.81<br>(36.13) | 115.10<br>(18.06) | 117.80<br>(12.54) | 136.65<br>(11.66) | 174.73<br>(24.09) | 128.22<br>(33.30) | 7.4<br>66†      | 2.3<br>24  | 4.642<br>* | 116.56<br>(18.64) | 139.79<br>(20.66) | 121.88<br>(13.98) | 87.27<br>(43.99)  | 145.67<br>(9.23) | 189.51<br>(15.29) | 166.03<br>(7.20) | 147.5<br>(42.97) | 29.<br>712<br>† | 5.5<br>86† | 0.647      |
| TFA (cm²)            | 15.04<br>(2.16)   | 13.74<br>(1.76)   | 12.78<br>(1.12)   | 15.17<br>(0.63)   | 13.44<br>(2.28)   | 13.14<br>(1.14)   | 0.0<br>08       | 2.5<br>62  | 0.098      | 13.49<br>(1.70)   | 14.99<br>(1.90)   | 13.64<br>(1.80)   | 11.83<br>(1.46)   | 16.12<br>(0.48)  | 13.17<br>(1.52)   | 11.74<br>(2.41)  | 13.20<br>(1.36)  | 0.0<br>13       | 3.1<br>61* | 3.629<br>* |
| TFI (%)              | 10.83<br>(2.43)   | 10.74<br>(0.74)   | 9.83<br>(0.87)    | 10.01<br>(0.39)   | 7.32<br>(2.00)    | 9.64<br>(3.00)    | 5.2<br>11*      | 1.8<br>32  | 3.126      | 10.46<br>(1.06)   | 9.72<br>(0.81)    | 10.06<br>(0.54)   | 12.96<br>(4.47)   | 9.99<br>(0.73)   | 6.55<br>(1.19)    | 6.62<br>(1.53)   | 8.75<br>(2.82)   | 25.<br>376<br>† | 5.6<br>96† | 2.462      |

|                         |                   |                   |                   |                   |                   |                   |                 |                 |            |                   |                   |                   |                   |                   |                   |                   |                   |                 |            |            |
|-------------------------|-------------------|-------------------|-------------------|-------------------|-------------------|-------------------|-----------------|-----------------|------------|-------------------|-------------------|-------------------|-------------------|-------------------|-------------------|-------------------|-------------------|-----------------|------------|------------|
| %F                      | 13.36<br>(1.97)   | 12.64<br>(2.24)   | 13.78<br>(1.78)   | 12.43<br>(0.36)   | 20.92<br>(5.43)   | 17.79<br>(5.82)   | 8.6<br>16‡      | 3.3<br>84*      | 4.961<br>‡ | 13.07<br>(1.90)   | 13.63<br>(2.41)   | 13.64<br>(2.23)   | 12.43<br>(0.36)   | 13.67<br>(0.99)   | 22.47<br>(5.58)   | 23.64<br>(4.27)   | 18.02<br>(6.01)   | 28.<br>945<br>‡ | 5.2<br>13‡ | 3.953<br>* |
| FM (kg)                 | 6.75<br>(1.59)    | 5.52<br>(1.31)    | 5.58<br>(1.11)    | 5.92<br>(1.05)    | 10.97<br>(3.49)   | 6.58<br>(3.70)    | 5.0<br>04*      | 3.6<br>10*      | 6.409<br>‡ | 5.60<br>(1.22)    | 6.59<br>(1.95)    | 5.95<br>(1.34)    | 5.27<br>(0.29)    | 6.67<br>(0.02)    | 12.88<br>(3.58)   | 11.54<br>(2.91)   | 7.75<br>(3.97)    | 25.<br>255<br>‡ | 5.6<br>86‡ | 3.030<br>* |
| FFM (kg)                | 43.39<br>(5.48)   | 37.92<br>(3.43)   | 34.69<br>(2.97)   | 41.58<br>(6.02)   | 40.91<br>(3.91)   | 28.92<br>(5.49)   | 0.8<br>84       | 12.<br>793<br>‡ | 3.049      | 36.98<br>(3.81)   | 41.41<br>(7.26)   | 37.67<br>(5.77)   | 37.23<br>(3.25)   | 42.33<br>(3.5)    | 44.28<br>(4.05)   | 36.96<br>(0.63)   | 33.63<br>(6.35)   | 0.2<br>57       | 2.6<br>11  | 1.058      |
| R (Ω)                   | 563.35<br>(34.04) | 577.82<br>(55.01) | 615.18<br>(69.45) | 557.90<br>(75.24) | 565.53<br>(42.42) | 689.80<br>(40.02) | 0.7<br>06       | 6.0<br>62‡      | 1.553      | 592.98<br>(63.14) | 612.65<br>(79.13) | 576.49<br>(58.93) | 584.6<br>(13.44)  | 532.27<br>(70.14) | 570.83<br>(8.88)  | 580.35<br>(49.14) | 637.40<br>(68.18) | 0.2<br>34       | 0.7<br>77  | 1.125      |
| Xc (Ω)                  | 62.70<br>(7.64)   | 71.04<br>(11.28)  | 69.84<br>(7.18)   | 56.60<br>(7.35)   | 58.61<br>(5.81)   | 75.15<br>(4.17)   | 1.7<br>55       | 4.0<br>82*      | 2.871      | 73.78<br>(10.19)  | 63.85<br>(6.51)   | 64.59<br>(5.76)   | 63.15<br>(1.34)   | 52.80<br>(3.99)   | 62.37<br>(2.35)   | 58.50<br>(10.04)  | 67.48<br>(9.33)   | 3.8<br>86       | 0.2<br>17  | 3.593<br>* |
| PA                      | 6.42<br>(0.80)    | 7.06<br>(1.20)    | 6.54<br>(0.84)    | 5.80<br>(0.65)    | 5.90<br>(0.40)    | 6.20<br>(0.50)    | 4.1<br>67*      | 0.4<br>24       | 0.646      | 7.19<br>(1.16)    | 6.00<br>(0.9)     | 6.40<br>(0.23)    | 6.2<br>(0.28)     | 5.63<br>(0.29)    | 6.23<br>(0.23)    | 5.75<br>(0.49)    | 6.03<br>(0.21)    | 3.2<br>02       | 0.3<br>40  | 1.984      |
| R/H<br>((Ω/cm)          | 346.12<br>(29.89) | 369.04<br>(37.22) | 414.14<br>(49.43) | 344.15<br>(62.36) | 364.72<br>(35.75) | 497.02<br>(6.36)  | 2.3<br>78       | 14.<br>728<br>‡ | 2.967      | 383.93<br>(44.64) | 392.72<br>(83.47) | 376.74<br>(49.09) | 380.82<br>(12.46) | 328.23<br>(57.00) | 363.35<br>(11.99) | 384.62<br>(38.31) | 439.03<br>(67.32) | 0.0<br>56       | 1.2<br>34  | 1.505      |
| Xc/H<br>((Ω/cm)         | 38.46<br>(4.48)   | 45.29<br>(6.71)   | 46.96<br>(4.45)   | 34.91<br>(6.15)   | 37.78<br>(4.29)   | 54.15<br>(0.83)   | 0.3<br>86       | 12.<br>735<br>‡ | 5.064<br>‡ | 47.66<br>(6.09)   | 40.69<br>(5.62)   | 42.22<br>(5.30)   | 41.19<br>(3.17)   | 32.51<br>(3.78)   | 39.68<br>(1.25)   | 38.80<br>(7.23)   | 46.56<br>(8.79)   | 2.4<br>95       | 0.5<br>66  | 4.119<br>* |
| CMJ (cm)                | 28.66<br>(6.77)   | 29.84<br>(2.84)   | 27.64<br>(2.72)   | 28.20<br>(7.92)   | 23.46<br>(4.55)   | 23.40<br>(2.55)   | 4.4<br>08*      | 0.7<br>35       | 1.038      | 27.73<br>(4.60)   | 30.12<br>(3.38)   | 28.58<br>(1.49)   | 29.95<br>(6.15)   | 30.13<br>(3.56)   | 24.90<br>(2.45)   | 19.55<br>(2.47)   | 21.68<br>(3.29)   | 11.<br>936<br>‡ | 2.2<br>19  | 3.787<br>* |
| Sprint 15<br>meters (s) | 2.82<br>(0.18)    | 2.83<br>(0.07)    | 2.84<br>(0.08)    | 2.80<br>(0.21)    | 3.12<br>(0.14)    | 3.11<br>(0.16)    | 12.<br>082<br>‡ | 4.1<br>94*      | 3.507<br>* | 2.85<br>(0.08)    | 2.85<br>(0.18)    | 2.82<br>(0.10)    | 2.76<br>(0.01)    | 2.89<br>(0.24)    | 3.09<br>(0.07)    | 3.19<br>(0.09)    | 3.13<br>(0.19)    | 24.<br>896<br>‡ | 1.4<br>94  | 2.659      |
| RSA (s)                 | 6.65<br>(0.34)    | 6.56<br>(0.13)    | 6.55<br>(0.12)    | 6.40<br>(0.30)    | 7.04<br>(0.34)    | 6.98<br>(0.23)    | 5.1<br>99*      | 3.0<br>78       | 5.548<br>‡ | 6.61<br>(0.21)    | 6.58<br>(0.27)    | 6.50<br>(0.10)    | 6.59<br>(0.13)    | 6.54<br>(0.38)    | 7.14<br>(0.16)    | 7.41<br>(0.12)    | 6.94<br>(0.28)    | 16.<br>242<br>‡ | 2.8<br>42  | 4.301‡     |

Note: E, early; OT, on time; L, late; Q1, quartile one; Q2, quartile two; Q3, quartile three; Q4, quartile four; Bo, Bologna F.C.; Ru, Russi; S. U.; MS, maturity status; RAE, relative age effect; SD, standard deviation; F, Snedecor-Fischer statistic test; BMI, body mass index; circ., circumference; SK, skinfold thickness; TUA, total upper area; UMA, upper muscle area; UFA, upper-fat area; UFI, upper-fat index; TCA, total calf area; CMA, calf mass area; CFA, calf fat area; CFI, calf fat index; TTA, total thigh area; TMA, thigh mass area; TFA, thigh fat area; TFI, thigh fat index; %F, fat percentage; FM, fat mass; FFM, fat-free mass; R, resistance; Xc, reactance; PA, phase angle; CMJ, counter-movement jump; RSA, repeated sprint ability; \*, p-value ≤ 0.05; ‡, p-value ≤ 0.01; †, p-value ≤ 0.001.
