# Supplementary material for: Maturation Selection Biases and Relative Age Effect in Italian Soccer Players of Different Levels
Source: MDPI journal article supplement (doi:10.3390/biology11111559), 2022-10-24
Supplement: s1 [file s1]

**Table S1.** Variables mean comparisons and interaction effects of Maturity Status, Teams and RAE in U12 soccer players.

|                                 | U12 Bologna       |                   |                   | U12 Russi         |                   |                   |                        |                        |                  | U12 Bologna       |                   |                   |                   | U12 Russi         |                   |                   |                   |                 |                 |                   |
|---------------------------------|-------------------|-------------------|-------------------|-------------------|-------------------|-------------------|------------------------|------------------------|------------------|-------------------|-------------------|-------------------|-------------------|-------------------|-------------------|-------------------|-------------------|-----------------|-----------------|-------------------|
|                                 | E<br>(n=6)        | OT<br>(n=6)       | L<br>(n=6)        | E<br>(n=5)        | OT<br>(n=8)       | L<br>(n=3)        | Bo<br>-<br>Ru          | M<br>S                 | tea<br>ms*<br>MS | Q1<br>(n=11<br>)  | Q2<br>(n=3)       | Q3<br>(n=2)       | Q4<br>(n=2)       | Q1<br>(n=3)       | Q2<br>(n=5)       | Q3<br>(n=5)       | Q4<br>(n=3)       | Bo<br>-<br>Ru   | R<br>A<br>E     | team<br>s*RA<br>E |
|                                 | Mean<br>(±<br>SD) | Mean<br>(±<br>SD) | Mean<br>(±<br>SD) | Mean<br>(±<br>SD) | Mean<br>(±<br>SD) | Mean<br>(±<br>SD) | F<br>(1,<br>31)        | F<br>(2,<br>31)        | F (5,<br>28)     | Mean<br>(±<br>SD) | F<br>(1,<br>30) | F<br>(3,<br>30) | F (7,<br>26)      |
| Weight<br>(Kg)                  | 46.50<br>(4.51)   | 42.33<br>(5.65)   | 35.00<br>(6.00)   | 41.70<br>(6.61)   | 38.12<br>(7.46)   | 40.00<br>(15.13)  | 0.2<br>65              | 2.0<br>12              | 1.301            | 42.09<br>(5.56)   | 40.67<br>(8.50)   | 36.00<br>(12.73)  | 43.00<br>(12.73)  | 37.33<br>(10.69)  | 39<br>(5.80)      | 43.3<br>(9.98)    | 36.67<br>(9.71)   | 0.1<br>80       | 0.0<br>01       | 0.820             |
| Height<br>(cm)                  | 159.03<br>(5.00)  | 154.30<br>(8.09)  | 145.20<br>(4.36)  | 144.30<br>(4.56)  | 141.82<br>(4.82)  | 141.30<br>(6.00)  | 27.<br>032<br>+        | 5.2<br>90 <sup>†</sup> | 2.365            | 153.60<br>(7.65)  | 155.40<br>(8.21)  | 143.75<br>(8.84)  | 153.95<br>(12.23) | 140.87<br>(5.32)  | 142.90<br>(5.72)  | 145.30<br>(1.64)  | 138.80<br>(5.21)  | 13.<br>117<br>+ | 0.5<br>20       | 1.818             |
| Trunk<br>Height<br>(cm)         | 80.82<br>(2.46)   | 78.10<br>(1.65)   | 73.27<br>(2.39)   | 74.74<br>(1.94)   | 72.57<br>(1.19)   | 66.17<br>(7.23)   | 41.<br>929<br>+        | 21.<br>346<br>+        | 0.218            | 77.28<br>(3.74)   | 78.23<br>(4.82)   | 74.35<br>(3.46)   | 79.80<br>(4.10)   | 71.23<br>(2.85)   | 73.46<br>(1.68)   | 70.46<br>(7.01)   | 73.17<br>(3.07)   | 10.<br>368<br>+ | 1.0<br>78       | 0.128             |
| Leg lenght<br>(cm)              | 78.22<br>(3.90)   | 76.20<br>(6.69)   | 71.93<br>(4.38)   | 69.56<br>(3.55)   | 69.25<br>(4.21)   | 75.13<br>(12.44)  | 4.2<br>30*             | 0.1<br>39              | 2.928            | 76.32<br>(5.53)   | 77.17<br>(3.51)   | 69.40<br>(5.37)   | 74.15<br>(8.13)   | 69.63<br>(2.92)   | 69.44<br>(4.15)   | 74.84<br>(8.55)   | 65.63<br>(2.65)   | 3.9<br>04       | 0.4<br>22       | 2.022             |
| BMI<br>(kg/m <sup>2</sup> )     | 18.36<br>(1.10)   | 17.74<br>(1.55)   | 16.53<br>(2.19)   | 20.08<br>(3.52)   | 18.91<br>(3.48)   | 19.69<br>(5.72)   | 3.6<br>67              | 0.4<br>12              | 0.294            | 17.78<br>(1.39)   | 16.69<br>(1.86)   | 17.14<br>(4.04)   | 17.89<br>(2.52)   | 18.60<br>(3.91)   | 19.17<br>(3.43)   | 20.46<br>(4.42)   | 18.92<br>(4.49)   | 2.5<br>02       | 0.0<br>92       | 0.253             |
| Relaxed<br>arm circ.<br>(cm)    | 21.73<br>(1.32)   | 21.72<br>(1.51)   | 19.20<br>(2.13)   | 22.62<br>(3.53)   | 21.56<br>(3.27)   | 22.37<br>(3.74)   | 1.8<br>80              | 0.6<br>43              | 1.002            | 21.55<br>(1.54)   | 19.87<br>(1.60)   | 19.40<br>(4.81)   | 20.20<br>(1.70)   | 21.70<br>(2.66)   | 21.36<br>(3.02)   | 23.40<br>(3.53)   | 21.27<br>(4.60)   | 2.3<br>74       | 0.2<br>41       | 0.591             |
| Contracted<br>arm circ.<br>(cm) | 23.22<br>(1.21)   | 22.82<br>(1.67)   | 20.68<br>(2.19)   | 24.02<br>(3.56)   | 22.82<br>(3.25)   | 23.67<br>(3.81)   | 1.7<br>50              | 0.6<br>96              | 0.798            | 22.81<br>(1.51)   | 21.80<br>(1.91)   | 20.65<br>(4.74)   | 21.35<br>(2.05)   | 23.03<br>(2.80)   | 22.70<br>(3.28)   | 24.46<br>(3.66)   | 22.93<br>(4.30)   | 2.1<br>52       | 0.1<br>16       | 0.507             |
| Calf circ.<br>(cm)              | 32.77<br>(0.93)   | 30.90<br>(1.93)   | 28.05<br>(1.82)   | 32.00<br>(2.93)   | 30.66<br>(2.68)   | 30.93<br>(6.02)   | 0.4<br>34              | 2.8<br>30              | 1.241            | 30.66<br>(2.18)   | 30.77<br>(2.89)   | 29.80<br>(5.52)   | 30.55<br>(3.32)   | 29.60<br>(3.86)   | 31.14<br>(2.72)   | 32.46<br>(3.82)   | 30.43<br>(3.73)   | 0.1<br>43       | 0.1<br>60       | 0.433             |
| Thigh circ.<br>(cm)             | 42.70<br>(2.85)   | 41.58<br>(3.19)   | 38.28<br>(3.24)   | 44.88<br>(5.37)   | 44.09<br>(5.22)   | 42.87<br>(7.58)   | 3.6<br>74              | 1.2<br>14              | 0.189            | 41.85<br>(2.59)   | 38.60<br>(1.78)   | 39.60<br>(8.77)   | 40.05<br>(5.16)   | 42.37<br>(6.78)   | 44.08<br>(5.00)   | 45.50<br>(5.94)   | 43.57<br>(6.16)   | 4.2<br>36*      | 0.0<br>76       | 0.540             |
| Humeral<br>diameter<br>(mm)     | 6.10<br>(0.18)    | 5.87<br>(0.46)    | 5.67<br>(0.39)    | 5.90<br>(0.54)    | 5.73<br>(0.33)    | 5.53<br>(0.49)    | 1.2<br>37              | 2.3<br>76              | 0.022            | 5.89<br>(0.39)    | 5.93<br>(0.55)    | 5.65<br>(0.49)    | 5.95<br>(0.21)    | 5.57<br>(0.55)    | 5.74<br>(0.43)    | 5.90<br>(0.48)    | 5.67<br>(0.29)    | 0.6<br>50       | 0.0<br>94       | 0.577             |
| Femoral<br>diameter<br>(mm)     | 8.90<br>(0.33)    | 8.62<br>(0.40)    | 8.27<br>(0.40)    | 9.12<br>(0.54)    | 8.88<br>(0.57)    | 8.80<br>(0.75)    | 3.6<br>90              | 2.2<br>55              | 0.273            | 8.62<br>(0.35)    | 8.63<br>(0.40)    | 8.35<br>(0.92)    | 8.65<br>(0.92)    | 8.83<br>(0.80)    | 9.12<br>(0.47)    | 8.88<br>(0.53)    | 8.83<br>(0.81)    | 2.6<br>86       | 0.2<br>56       | 0.175             |
| Triceps SK<br>(mm)              | 9.25<br>(2.68)    | 9.08<br>(2.65)    | 8.17<br>(3.30)    | 12.40<br>(3.29)   | 10.06<br>(3.05)   | 11.33<br>(2.52)   | 5.2<br>20*             | 0.5<br>90              | 0.535            | 9.41<br>(2.70)    | 7.67<br>(1.53)    | 7.50<br>(3.54)    | 8.75<br>(5.30)    | 10.33<br>(1.15)   | 9.40<br>(2.07)    | 13.00<br>(2.92)   | 11.17<br>(5.01)   | 5.2<br>52*      | 0.4<br>78       | 0.768             |
| Biceps SK<br>(mm)               | 6.67<br>(1.89)    | 5.83<br>(2.07)    | 4.50<br>(1.84)    | 8.30<br>(2.99)    | 7.00<br>(3.12)    | 9.33<br>(3.21)    | 7.7<br>97 <sup>†</sup> | 0.5<br>36              | 1.426            | 6.00<br>(2.05)    | 4.67<br>(0.58)    | 5.00<br>(2.12)    | 6.00<br>(4.24)    | 7.67<br>(0.58)    | 6.70<br>(3.73)    | 8.80<br>(3.03)    | 8.33<br>(4.04)    | 5.2<br>81*      | 0.4<br>02       | 0.195             |

|                        |                   |                   |                   |                   |                   |                   |                         |                        |       |                   |                   |                   |                   |                   |                   |                   |                   |                        |           |       |
|------------------------|-------------------|-------------------|-------------------|-------------------|-------------------|-------------------|-------------------------|------------------------|-------|-------------------|-------------------|-------------------|-------------------|-------------------|-------------------|-------------------|-------------------|------------------------|-----------|-------|
| Subscapular SK (mm)    | 6.42<br>(1.91)    | 6.50<br>(1.64)    | 5.00<br>(1.26)    | 8.50<br>(3.91)    | 6.81<br>(4.29)    | 6.83<br>(1.61)    | 1.8<br>41               | 0.6<br>65              | 0.333 | 6.23<br>(1.37)    | 5.00<br>(1.00)    | 5.00<br>(1.41)    | 7.00<br>(4.24)    | 7.167<br>(1.89)   | 7.00<br>(5.05)    | 7.00<br>(2.67)    | 8.67<br>(5.51)    | 1.9<br>06              | 0.4<br>39 | 0.057 |
| Supraspinal SK (mm)    | 6.42<br>(2.01)    | 7.17<br>(2.32)    | 5.42<br>(2.08)    | 9.20<br>(4.66)    | 7.06<br>(4.14)    | 9.00<br>(3.46)    | 3.1<br>68               | 0.1<br>50              | 1.002 | 6.82<br>(1.85)    | 5.17<br>(2.02)    | 5.75<br>(3.18)    | 6.00<br>(4.24)    | 7.67<br>(1.15)    | 6.30<br>(4.62)    | 9.40<br>(3.78)    | 9.33<br>(6.03)    | 2.9<br>10              | 0.4<br>99 | 0.317 |
| Suprailiac SK (mm)     | 9.42<br>(2.91)    | 9.08<br>(3.14)    | 7.42<br>(3.23)    | 12.70<br>(5.45)   | 9.13<br>(4.36)    | 12.67<br>(4.04)   | 4.1<br>53               | 0.7<br>60              | 1.225 | 9.45<br>(2.83)    | 7.17<br>(0.76)    | 6.50<br>(3.54)    | 8.50<br>(6.36)    | 11.00<br>(1.73)   | 8.40<br>(4.34)    | 12.30<br>(4.76)   | 12.67<br>(7.51)   | 4.0<br>46              | 0.6<br>76 | 0.484 |
| Thigh SK (mm)          | 11.33<br>(1.89)   | 11.08<br>(2.46)   | 9.75<br>(3.00)    | 13.60<br>(3.65)   | 11.94<br>(3.49)   | 13.33<br>(5.13)   | 3.8<br>26               | 0.3<br>20              | 0.479 | 11.14<br>(2.58)   | 9.50<br>(0.87)    | 10.00<br>(2.83)   | 11.00<br>(4.24)   | 11.33<br>(2.08)   | 11.90<br>(4.10)   | 14.40<br>(4.10)   | 12.67<br>(4.16)   | 2.8<br>83              | 0.2<br>71 | 0.520 |
| Medial Calf SK (mm)    | 8.75<br>(1.99)    | 8.17<br>(3.13)    | 6.42<br>(2.91)    | 11.00<br>(2.92)   | 9.50<br>(2.67)    | 12.00<br>(4.36)   | 8.7<br>21 <sup>†</sup>  | 0.3<br>99              | 1.417 | 8.14<br>(2.79)    | 6.67<br>(1.53)    | 7.50<br>(3.54)    | 7.75<br>(5.30)    | 10.33<br>(1.53)   | 8.80<br>(3.11)    | 12.00<br>(3.46)   | 10.67<br>(3.21)   | 6.1<br>17*             | 0.5<br>83 | 0.215 |
| Lateral Calf SK (mm)   | 9.25<br>(1.17)    | 8.25<br>(3.06)    | 7.67<br>(3.08)    | 11.20<br>(3.29)   | 9.81<br>(2.64)    | 12.50<br>(3.97)   | 7.4<br>88 <sup>†</sup>  | 0.6<br>42              | 0.917 | 8.77<br>(2.52)    | 8.17<br>(1.26)    | 8.00<br>(4.24)    | 7.00<br>(4.24)    | 10.83<br>(1.26)   | 8.90<br>(3.05)    | 12.40<br>(3.60)   | 11.00<br>(3.00)   | 6.1<br>43*             | 0.4<br>72 | 0.576 |
| TUA (cm <sup>2</sup> ) | 37.72<br>(4.61)   | 37.70<br>(5.07)   | 29.65<br>(6.43)   | 41.53<br>(12.70)  | 37.76<br>(11.32)  | 40.57<br>(13.75)  | 2.2<br>40               | 0.5<br>57              | 0.884 | 37.16<br>(5.17)   | 31.56<br>(5.08)   | 30.89<br>(14.85)  | 32.60<br>(5.46)   | 37.87<br>(9.30)   | 36.90<br>(11.03)  | 44.39<br>(12.66)  | 37.13<br>(15.65)  | 2.5<br>66              | 0.2<br>41 | 0.539 |
| UMA (cm <sup>2</sup> ) | 30.47<br>(4.58)   | 30.41<br>(4.86)   | 23.06<br>(6.42)   | 35.11<br>(12.63)  | 30.92<br>(10.95)  | 33.85<br>(13.41)  | 2.7<br>12               | 0.5<br>40              | 0.826 | 30.04<br>(5.05)   | 24.48<br>(4.05)   | 24.10<br>(13.98)  | 25.81<br>(6.36)   | 30.97<br>(8.69)   | 29.87<br>(10.55)  | 37.93<br>(12.46)  | 30.85<br>(15.53)  | 2.9<br>83              | 0.2<br>68 | 0.579 |
| UFA (cm <sup>2</sup> ) | 7.25<br>(0.77)    | 7.29<br>(0.75)    | 6.59<br>(0.57)    | 6.42<br>(0.51)    | 6.84<br>(0.64)    | 6.72<br>(0.34)    | 2.7<br>76               | 1.0<br>91              | 1.307 | 7.13<br>(0.72)    | 7.08<br>(1.03)    | 6.79<br>(0.87)    | 6.79<br>(0.90)    | 6.90<br>(0.64)    | 7.03<br>(0.59)    | 6.46<br>(0.47)    | 6.28<br>(0.31)    | 1.0<br>80              | 0.9<br>48 | 0.118 |
| UFI (%)                | 19.42<br>(2.81)   | 19.61<br>(3.25)   | 23.12<br>(5.16)   | 16.64<br>(5.03)   | 19.40<br>(5.31)   | 17.61<br>(4.66)   | 3.0<br>77               | 0.6<br>66              | 0.892 | 19.51<br>(3.33)   | 22.48<br>(0.43)   | 24.08<br>(8.76)   | 21.37<br>(6.35)   | 18.70<br>(3.04)   | 19.91<br>(3.83)   | 15.63<br>(4.89)   | 19.16<br>(8.47)   | 3.7<br>85              | 0.2<br>99 | 0.871 |
| TCA (cm <sup>2</sup> ) | 85.54<br>(4.85)   | 76.27<br>(9.48)   | 62.86<br>(8.14)   | 82.08<br>(14.81)  | 75.36<br>(13.37)  | 78.11<br>(30.76)  | 0.5<br>81               | 2.4<br>58              | 1.312 | 75.21<br>(10.52)  | 75.81<br>(13.86)  | 71.91<br>(26.17)  | 74.75<br>(16.17)  | 70.55<br>(18.34)  | 77.68<br>(13.86)  | 84.82<br>(20.07)  | 74.48<br>(18.31)  | 0.1<br>64              | 0.1<br>78 | 0.393 |
| CMA (cm <sup>2</sup> ) | 58.61<br>(4.75)   | 52.97<br>(7.23)   | 44.49<br>(3.08)   | 50.39<br>(11.07)  | 48.33<br>(5.83)   | 43.63<br>(12.98)  | 3.0<br>63               | 4.7<br>56 <sup>†</sup> | 0.594 | 51.46<br>(8.14)   | 54.55<br>(9.45)   | 49.87<br>(12.20)  | 53.49<br>(1.35)   | 42.42<br>(11.04)  | 52.32<br>(7.43)   | 49.14<br>(6.62)   | 44.97<br>(12.08)  | 2.2<br>86              | 0.8<br>00 | 0.418 |
| CFA (cm <sup>2</sup> ) | 26.93<br>(4.45)   | 23.30<br>(8.85)   | 18.37<br>(8.25)   | 31.69<br>(9.58)   | 27.03<br>(9.18)   | 34.47<br>(17.90)  | 6.0<br>20 <sup>†</sup>  | 0.6<br>14              | 1.244 | 23.74<br>(7.48)   | 21.26<br>(5.24)   | 22.04<br>(13.97)  | 21.26<br>(14.82)  | 28.12<br>(7.30)   | 25.36<br>(10.35)  | 35.68<br>(13.65)  | 29.51<br>(9.56)   | 3.8<br>61              | 0.3<br>51 | 0.336 |
| CFI (%)                | 31.44<br>(4.50)   | 30.07<br>(9.71)   | 28.34<br>(9.25)   | 38.54<br>(8.84)   | 35.16<br>(6.33)   | 42.83<br>(5.10)   | 10.<br>462 <sup>†</sup> | 0.4<br>80              | 0.983 | 31.23<br>(8.26)   | 27.87<br>(3.25)   | 29.04<br>(8.86)   | 26.93<br>(14.01)  | 39.87<br>(0.07)   | 32.01<br>(7.85)   | 40.95<br>(6.12)   | 39.37<br>(8.55)   | 9.4<br>63 <sup>†</sup> | 0.8<br>44 | 0.402 |
| TTA (cm <sup>2</sup> ) | 145.70<br>(18.92) | 138.35<br>(20.87) | 117.39<br>(19.70) | 162.20<br>(47.44) | 156.65<br>(37.68) | 149.35<br>(52.91) | 3.9<br>83               | 1.0<br>33              | 0.166 | 139.90<br>(17.06) | 118.80<br>(11.04) | 127.91<br>(55.29) | 128.77<br>(32.92) | 145.35<br>(46.41) | 156.29<br>(37.47) | 167.08<br>(41.73) | 153.13<br>(42.46) | 4.2<br>58*             | 0.1<br>03 | 0.461 |
| TMA (cm <sup>2</sup> ) | 132.42<br>(18.64) | 125.29<br>(20.76) | 104.66<br>(19.96) | 149.98<br>(38.22) | 143.53<br>(38.35) | 137.70<br>(54.28) | 4.1<br>03               | 0.9<br>38              | 0.173 | 126.78<br>(17.10) | 105.71<br>(10.27) | 114.98<br>(53.99) | 116.27<br>(33.81) | 132.28<br>(45.46) | 143.17<br>(39.00) | 155.29<br>(42.70) | 140.69<br>(43.21) | 4.2<br>56*             | 0.1<br>14 | 0.464 |
| TFA (cm <sup>2</sup> ) | 13.29<br>(1.13)   | 13.06<br>(1.19)   | 12.72<br>(1.26)   | 12.23<br>(1.22)   | 13.13<br>(1.39)   | 11.65<br>(1.47)   | 2.2<br>85               | 1.2<br>91              | 0.802 | 13.12<br>(1.32)   | 13.08<br>(0.91)   | 12.93<br>(1.30)   | 12.50<br>(0.89)   | 13.08<br>(1.00)   | 13.12<br>(1.69)   | 11.79<br>(1.51)   | 12.44<br>(0.85)   | 0.3<br>30              | 0.5<br>94 | 0.274 |
| TFI (%)                | 9.23<br>(1.28)    | 9.62<br>(1.75)    | 11.12<br>(2.20)   | 8.00<br>(2.57)    | 8.85<br>(2.35)    | 8.66<br>(3.65)    | 3.4<br>51               | 0.7<br>53              | 0.370 | 9.52<br>(1.64)    | 11.04<br>(0.56)   | 10.91<br>(3.70)   | 10.12<br>(3.28)   | 9.49<br>(2.40)    | 8.85<br>(2.43)    | 7.60<br>(2.81)    | 8.69<br>(3.14)    | 3.6<br>40              | 0.1<br>12 | 0.664 |
| %F                     | 15.17<br>(4.02)   | 15.12<br>(3.65)   | 12.72<br>(4.30)   | 19.78<br>(6.14)   | 16.14<br>(6.03)   | 17.56<br>(3.55)   | 3.9<br>53               | 0.6<br>48              | 0.568 | 15.17<br>(3.51)   | 12.34<br>(0.58)   | 12.08<br>(5.00)   | 15.01<br>(9.15)   | 16.98<br>(2.87)   | 15.71<br>(5.93)   | 19.11<br>(4.95)   | 18.57<br>(9.57)   | 3.8<br>63              | 0.3<br>54 | 0.316 |
| FM (kg)                | 7.09<br>(2.26)    | 6.46<br>(1.78)    | 4.65<br>(2.32)    | 8.47<br>(3.54)    | 6.49<br>(3.41)    | 7.34<br>(4.04)    | 1.7<br>47               | 1.0<br>32              | 0.554 | 6.44<br>(1.74)    | 4.99<br>(0.85)    | 4.67<br>(3.34)    | 7.04<br>(5.84)    | 6.50<br>(2.71)    | 6.35<br>(3.38)    | 8.55<br>(3.59)    | 7.43<br>(5.00)    | 1.4<br>20              | 0.2<br>76 | 0.513 |
| FFM (kg)               | 39.41<br>(3.85)   | 35.87<br>(4.59)   | 30.35<br>(3.86)   | 33.23<br>(4.14)   | 31.63<br>(4.52)   | 32.66<br>(11.12)  | 2.2<br>31               | 2.1<br>44              | 1.739 | 35.65<br>(4.65)   | 35.68<br>(7.67)   | 31.33<br>(9.39)   | 35.96<br>(6.89)   | 30.83<br>(8.04)   | 32.65<br>(3.24)   | 34.75<br>(6.81)   | 29.24<br>(4.74)   | 1.4<br>92              | 0.0<br>83 | 0.828 |

|                         |                   |                   |                   |                   |                    |                   |                        |                        |            |                   |                    |                    |                   |                    |                   |                   |                   |                        |           |       |
|-------------------------|-------------------|-------------------|-------------------|-------------------|--------------------|-------------------|------------------------|------------------------|------------|-------------------|--------------------|--------------------|-------------------|--------------------|-------------------|-------------------|-------------------|------------------------|-----------|-------|
| R ( $\Omega$ )          | 607.75<br>(77.22) | 631.10<br>(60.77) | 681.83<br>(84.04) | 731.39<br>(86.33) | 717.00<br>(121.95) | 750.67<br>(68.45) | 8.2<br>56 <sup>†</sup> | 0.7<br>35              | 0.240      | 624.41<br>(58.92) | 695.33<br>(123.06) | 646.05<br>(153.37) | 638.75<br>(18.74) | 673.82<br>(183.09) | 771.16<br>(82.26) | 742.90<br>(67.66) | 684.38<br>(65.19) | 3.5<br>66              | 1.3<br>51 | 0.111 |
| Xc ( $\Omega$ )         | 59.82<br>(7.38)   | 60.00<br>(5.16)   | 70.50<br>(8.02)   | 73.65<br>(5.20)   | 72.28<br>(8.70)    | 74.82<br>(4.13)   | 16.<br>003<br>+        | 2.3<br>84              | 1.168      | 63.29<br>(7.82)   | 69.07<br>(14.02)   | 59.30<br>(4.10)    | 59.95<br>(0.49)   | 68.68<br>(13.55)   | 76.05<br>(4.96)   | 74.45<br>(4.02)   | 70.82<br>(3.93)   | 9.7<br>17 <sup>†</sup> | 1.2<br>79 | 0.527 |
| PA                      | 5.62<br>(0.17)    | 5.45<br>(0.47)    | 5.933<br>(0.89)   | 5.86<br>(0.33)    | 5.86<br>(0.37)     | 5.78<br>(0.27)    | 0.9<br>03              | 0.4<br>30              | 0.829      | 5.79<br>(0.67)    | 5.63<br>(0.15)     | 5.35<br>(0.92)     | 5.35<br>(0.07)    | 5.96<br>(0.51)     | 5.70<br>(0.32)    | 5.80<br>(0.26)    | 6.04<br>(0.25)    | 2.9<br>90              | 0.4<br>79 | 0.460 |
| R/H<br>( $\Omega$ /cm)  | 382.53<br>(51.13) | 410.26<br>(48.15) | 470.50<br>(65.03) | 506.70<br>(56.77) | 506.60<br>(89.53)  | 532.22<br>(57.45) | 15.<br>859<br>+        | 1.8<br>09              | 0.519      | 407.88<br>(47.44) | 450.85<br>(101.70) | 453.56<br>(134.58) | 416.71<br>(45.28) | 481.13<br>(140.74) | 539.67<br>(54.28) | 511.66<br>(51.33) | 494.31<br>(61.79) | 6.9<br>62*             | 0.8<br>31 | 0.051 |
| Xc/H<br>( $\Omega$ /cm) | 37.67<br>(5.07)   | 38.99<br>(4.10)   | 48.55<br>(5.24)   | 51.05<br>(3.40)   | 51.06<br>(6.64)    | 53.03<br>(4.03)   | 29.<br>378<br>+        | 4.2<br>58*             | 1.960      | 41.43<br>(6.56)   | 44.83<br>(11.35)   | 41.42<br>(5.40)    | 39.08<br>(3.43)   | 48.98<br>(10.87)   | 53.25<br>(3.36)   | 51.26<br>(3.24)   | 51.12<br>(4.40)   | 13.<br>712<br>+        | 0.5<br>85 | 0.140 |
| CMJ (cm)                | 27.75<br>(2.95)   | 28.68<br>(0.97)   | 27.55<br>(4.20)   | 19.96<br>(4.26)   | 27.71<br>(3.58)    | 21.03<br>(2.65)   | 18.<br>026<br>+        | 6.1<br>87 <sup>†</sup> | 3.590<br>* | 27.32<br>(2.81)   | 29.60<br>(2.69)    | 30.25<br>(1.20)    | 27.05<br>(4.60)   | 22.53<br>(4.71)    | 27.04<br>(3.41)   | 23.38<br>(6.82)   | 21.63<br>(4.82)   | 9.1<br>52 <sup>†</sup> | 1.3<br>34 | 0.314 |
| Sprint 15<br>meters (s) | 2.73<br>(0.14)    | 2.68<br>(0.10)    | 2.73<br>(0.12)    | 3.24<br>(0.24)    | 3.08<br>(0.11)     | 3.35<br>(0.17)    | 97.<br>685<br>+        | 3.7<br>94*             | 1.761      | 2.72<br>(0.12)    | 2.67<br>(0.04)     | 2.63<br>(0.04)     | 2.78<br>(0.23)    | 3.35<br>(0.17)     | 3.03<br>(0.02)    | 3.18<br>(0.21)    | 3.25<br>(0.18)    | 66.<br>984<br>+        | 2.9<br>92 | 1.317 |
| RSA (s)                 | 6.36<br>(0.27)    | 6.27<br>(0.13)    | 6.39<br>(0.24)    | 7.30<br>(0.66)    | 7.01<br>(0.28)     | 7.55<br>(0.24)    | 65.<br>095<br>+        | 2.8<br>66              | 1.141      | 6.37<br>(0.23)    | 6.21<br>(0.16)     | 6.26<br>(0.03)     | 6.51<br>(0.35)    | 7.69<br>(0.07)     | 6.98<br>(0.31)    | 7.23<br>(0.50)    | 7.18<br>(0.51)    | 44.<br>826<br>+        | 2.4<br>43 | 1.213 |

Note: E, early; OT, on time; L, late; Q1, quartile one; Q2, quartile two; Q3, quartile three; Q4, quartile four; Bo, Bologna F.C.; Ru, Russi; S. U.; MS, maturity status; RAE, relative age effect; SD, standard deviation; F, Snedecor-Fischer statistic test; BMI, body mass index; circ., circumference; SK, skinfold thickness; TUA, total upper area; UMA, upper muscle area; UFA, upper-fat area; UFI, upper-fat index; TCA, total calf area; CMA, calf mass area; CFA, calf fat area; CFI, calf fat index; TTA, total thigh area; TMA, thigh mass area; TFA, thigh fat area; TFI, thigh fat index; %F, fat percentage; FM, fat mass; FFM, fat-free mass; R, resistance; Xc, reactance; PA, phase angle; CMJ, counter-movement jump; RSA, repeated sprint ability; \*, p-value  $\leq 0.05$ ; †, p-value  $\leq 0.01$ ; ‡, p-value  $\leq 0.001$ .
