# Supplementary material for: Maturation Selection Biases and Relative Age Effect in Italian Soccer Players of Different Levels
Source: MDPI journal article supplement (doi:10.3390/biology11111559), 2022-10-24
Supplement: s1 [file s1]

**Table S4.** Variables mean comparisons and interaction effects of Maturity Status, Teams and RAE in U15 soccer players.

|                                  | U15 Bologna            |                        |                        | U15 Russi              |                        |                        |                 |                 |              | U15 Bologna            |                        |                        |                        | U15 Russi              |                        |                        |                        |                 |                 |                   |
|----------------------------------|------------------------|------------------------|------------------------|------------------------|------------------------|------------------------|-----------------|-----------------|--------------|------------------------|------------------------|------------------------|------------------------|------------------------|------------------------|------------------------|------------------------|-----------------|-----------------|-------------------|
|                                  | E<br>(n=9)             | OT<br>(n=8)            | L<br>(n=6)             | E<br>(n=5)             | OT<br>(n=5)            | L<br>(n=5)             | Bo<br>-<br>Ru   | tea<br>M<br>S   | ms*<br>MS    | Q1<br>(n=11<br>)       | Q2<br>(n=5)            | Q3<br>(n=3)            | Q4<br>(n=4)            | Q1<br>(n=6)            | Q2<br>(n=3)            | Q3<br>(n=1)            | Q4<br>(n=5)            | Bo<br>-<br>Ru   | R<br>A<br>E     | team<br>s*RA<br>E |
|                                  | Mean<br>( $\pm$<br>SD) | F<br>(1,<br>36) | F<br>(2,<br>35) | F (5,<br>32) | Mean<br>( $\pm$<br>SD) | F<br>(1,<br>36) | F<br>(3,<br>35) | F (7,<br>30)      |
| Weight<br>(Kg)                   | 66.90<br>(9.18)        | 62.75<br>(4.56)        | 56.67<br>(10.95)       | 70.10<br>(15.70)       | 55.80<br>(8.87)        | 50.00<br>(4.00)        | 1.2<br>44       | 8.0<br>39*      | 1.193        | 63.55<br>(6.33)        | 65.00<br>(9.70)        | 62.33<br>(5.69)        | 58.25<br>(16.74)       | 58.08<br>(8.63)        | 74.00<br>(22.34)       | 56.0<br>0              | 50.60<br>(2.51)        | 0.4<br>14       | 3.0<br>42<br>*  | 1.137             |
| Height<br>(cm)                   | 179.92<br>(6.37)       | 171.69<br>(5.92)       | 165.50<br>(9.21)       | 178.04<br>(3.75)       | 167.68<br>(3.76)       | 163.60<br>(7.26)       | 1.4<br>69       | 15.<br>62<br>2† | 0.110        | 177.87<br>(7.23)       | 171.66<br>(5.32)       | 171.17<br>(1.02)       | 164.35<br>(13.66)      | 167.40<br>(9.21)       | 173.97<br>(10.10)      | 167.<br>90             | 170.48<br>(6.26)       | 0.1<br>65       | 0.9<br>42       | 2.294             |
| Trunk<br>Height<br>(cm)          | 92.89<br>(1.27)        | 87.46<br>(2.40)        | 82.40<br>(3.87)        | 91.36<br>(1.08)        | 86.66<br>(2.04)        | 83.02<br>(2.10)        | 0.5<br>60       | 50.<br>55<br>4† | 0.666        | 90.35<br>(2.83)        | 87.90<br>(4.23)        | 86.77<br>(4.82)        | 84.13<br>(8.37)        | 87.13<br>(4.77)        | 89.60<br>(3.84)        | 83.0<br>0              | 86.12<br>(2.75)        | 0.2<br>16       | 1.8<br>28       | 1                 |
| Leg length<br>(cm)               | 87.03<br>(6.23)        | 84.23<br>(3.89)        | 83.10<br>(5.63)        | 86.68<br>(4.30)        | 81.02<br>(2.70)        | 80.58<br>(6.48)        | 1.3<br>94       | 3.3<br>83*      | 0.263        | 87.53<br>(5.52)        | 83.76<br>(3.04)        | 84.40<br>(4.47)        | 80.23<br>(5.38)        | 80.27<br>(5.29)        | 84.37<br>(6.44)        | 84.9<br>0              | 84.36<br>(5.04)        | 0.0<br>6        | 0.2<br>71       | 2.632             |
| BMI<br>(kg/m²)                   | 20.70<br>(2.94)        | 21.32<br>(1.75)        | 20.55<br>(3.15)        | 22.08<br>(4.67)        | 19.83<br>(2.92)        | 18.71<br>(1.44)        | 0.4<br>50       | 1.0<br>86       | 1.142        | 20.14<br>(2.15)        | 22.00<br>(2.53)        | 21.29<br>(2.15)        | 21.21<br>(4.01)        | 20.66<br>(2.03)        | 24.04<br>(5.02)        | 19.8<br>6              | 17.44<br>(1.05)        | 0.3<br>95       | 2.8<br>66       | 1.98              |
| Relaxed<br>arm circ.<br>(cm)     | 24.87<br>(2.03)        | 24.05<br>(1.09)        | 23.85<br>(1.99)        | 26.92<br>(4.42)        | 24.28<br>(1.98)        | 22.42<br>(1.02)        | 0.1<br>46       | 4.6<br>8*       | 1.807        | 24.53<br>(1.75)        | 24.44<br>(1.56)        | 24.03<br>(1.33)        | 23.80<br>(2.59)        | 24.42<br>(2.11)        | 28.60<br>(5.02)        | 23.6<br>0              | 22.44<br>(1.02)        | 0.4<br>21       | 3.4<br>76<br>*  | 2.478             |
| Contracte<br>d arm circ.<br>(cm) | 26.92<br>(5.31)        | 26.64<br>(1.05)        | 26.30<br>(2.73)        | 28.66<br>(4.87)        | 25.96<br>(1.97)        | 24.62<br>(1.44)        | 0.0<br>31       | 1.3<br>77       | 0.768        | 26.54<br>(4.65)        | 26.80<br>(1.7)         | 27.33<br>(2.06)        | 26.33<br>(3.34)        | 26.58<br>(1.73)        | 30.73<br>(5.05)        | 24.9<br>0              | 23.92<br>(1.16)        | 0.0<br>25       | 1.6<br>19       | 1.355             |
| Calf circ.<br>(cm)               | 35.66<br>(2.27)        | 34.70<br>(1.70)        | 32.70<br>(2.51)        | 37.48<br>(3.54)        | 34.76<br>(2.89)        | 32.54<br>(1.20)        | 0.5<br>20       | 8.0<br>65†      | 0.639        | 34.89<br>(1.45)        | 35.44<br>(2.68)        | 33.43<br>(0.61)        | 33.35<br>(4.47)        | 35.65<br>(2.24)        | 37.80<br>(5.60)        | 33.6<br>0              | 32.60<br>(1.20)        | 0.3<br>67       | 3.0<br>8*       | 0.493             |
| Thigh circ.<br>(cm)              | 47.27<br>(3.91)        | 45.93<br>(4.67)        | 45.27<br>(2.84)        | 52.10<br>(6.71)        | 47.84<br>(5.21)        | 45.06<br>(3.62)        | 2.0<br>80       | 3.0<br>43       | 0.932        | 47.35<br>(2.02)        | 48.42<br>(4.45)        | 42.17<br>(6.12)        | 43.75<br>(2.87)        | 49.78<br>(3.49)        | 53.37<br>(9.15)        | 49.0<br>0              | 43.44<br>(2.72)        | 4.7<br>20*      | 5.2<br>44†      | 0.893             |
| Humeral<br>diameter<br>(mm)      | 6.90<br>(0.31)         | 6.63<br>(0.17)         | 6.55<br>(0.33)         | 6.92<br>(0.35)         | 6.64<br>(0.44)         | 6.42<br>(0.33)         | 0.0<br>90       | 5.6<br>09†      | 0.207        | 6.76<br>(0.29)         | 6.82<br>(0.36)         | 6.70<br>(0.10)         | 6.45<br>(0.33)         | 6.55<br>(0.30)         | 6.80<br>(0.66)         | 6.60                   | 6.72<br>(0.46)         | 0.0<br>12       | 0.5<br>59       | 0.868             |
| Femoral<br>diameter<br>(mm)      | 9.72<br>(0.38)         | 9.43<br>(0.24)         | 8.97<br>(0.44)         | 10.18<br>(0.64)        | 9.56<br>(0.38)         | 9.46<br>(0.50)         | 6.5<br>4†       | 9.2<br>54†      | 0.653        | 9.54<br>(0.29)         | 9.62<br>(0.53)         | 9.27<br>(0.31)         | 8.98<br>(0.64)         | 9.80<br>(0.28)         | 10.23<br>(1.10)        | 9.90                   | 9.32<br>(0.28)         | 6.2<br>07*      | 4.1<br>54†      | 0.316             |
| Triceps SK<br>(mm)               | 7.28<br>(2.24)         | 5.81<br>(1.60)         | 6.75<br>(1.25)         | 9.30<br>(4.35)         | 8.20<br>(3.27)         | 6.60<br>(2.16)         | 2.8<br>50       | 1.3<br>98       | 0.844        | 6.23<br>(1.71)         | 6.80<br>(3.05)         | 7.33<br>(1.15)         | 7.00<br>(0.82)         | 7.58<br>(2.11)         | 11.17<br>(4.75)        | 7.00                   | 6.90<br>(3.54)         | 1.7<br>28       | 1.3<br>01       | 1.256             |
| Biceps SK<br>(mm)                | 3.78<br>(1.09)         | 3.50<br>(0.46)         | 3.67<br>(0.61)         | 5.80<br>(2.95)         | 5.10<br>(2.01)         | 4.40<br>(0.89)         | 9.0<br>24†      | 0.8<br>43       | 0.598        | 3.55<br>(0.69)         | 3.70<br>(1.30)         | 3.67<br>(0.58)         | 3.88<br>(0.48)         | 4.50<br>(1.38)         | 7.67<br>(2.31)         | 5.00                   | 4.30<br>(1.86)         | 0.99<br>†       | 3.2<br>*        | 3.234<br>*        |

|                      |                   |                   |                   |                   |                   |                   |            |            |       |                   |                   |                   |                   |                   |                   |                 |                   |            |            |        |
|----------------------|-------------------|-------------------|-------------------|-------------------|-------------------|-------------------|------------|------------|-------|-------------------|-------------------|-------------------|-------------------|-------------------|-------------------|-----------------|-------------------|------------|------------|--------|
| Subscapular SK (mm)  | 7.17<br>(1.62)    | 6.38<br>(1.16)    | 6.50<br>(1.48)    | 8.30<br>(3.87)    | 7.30<br>(0.84)    | 5.20<br>(0.76)    | 0.1<br>73  | 3.1<br>53  | 1.567 | 6.77<br>(1.44)    | 6.50<br>(1.66)    | 7.00<br>(1.32)    | 6.63<br>(1.70)    | 6.25<br>(1.21)    | 10.17<br>(4.07)   | 6.00<br>(1.58)  | 0.2<br>85         | 2.2<br>47  | 2.865      |        |
| Supraspinal SK (mm)  | 5.56<br>(1.33)    | 5.56<br>(1.12)    | 5.00<br>(0.84)    | 8.80<br>(4.38)    | 6.90<br>(3.05)    | 4.90<br>(0.65)    | 4.5<br>10* | 3.3<br>02* | 1.889 | 5.32<br>(1.12)    | 5.60<br>(1.39)    | 5.83<br>(1.04)    | 5.13<br>(1.18)    | 6.75<br>(2.72)    | 10.67<br>(4.93)   | 5.20<br>(1.15)  | 2.7<br>23         | 3.5<br>08* | 2.915      |        |
| Suprailiac SK (mm)   | 8.17<br>(2.03)    | 7.75<br>(2.14)    | 8.33<br>(2.07)    | 11.20<br>(4.49)   | 11.00<br>(2.55)   | 7.70<br>(1.96)    | 4.8<br>87* | 1.3<br>88  | 2.084 | 7.73<br>(2.11)    | 8.20<br>(2.59)    | 9.00<br>(1.73)    | 8.13<br>(1.44)    | 9.50<br>(3.03)    | 13.33<br>(4.73)   | 8.60<br>(2.51)  | 3.6<br>28         | 1.4<br>72  | 1.275      |        |
| Thigh SK (mm)        | 9.28<br>(2.48)    | 8.19<br>(1.56)    | 7.83<br>(1.29)    | 12.20<br>(6.30)   | 9.90<br>(3.03)    | 9.20<br>(2.59)    | 3.8<br>74  | 1.7<br>71  | 0.219 | 8.23<br>(1.42)    | 9.00<br>(3.66)    | 9.67<br>(0.58)    | 7.88<br>(0.63)    | 9.42<br>(2.11)    | 16.00<br>(5.20)   | 11.0<br>0       | 8.20<br>(3.40)    | 5.7<br>07* | 4.8<br>31† | 2.804* |
| Medial Calf SK (mm)  | 7.06<br>(1.49)    | 5.50<br>(0.96)    | 5.00<br>(0.71)    | 9.40<br>(3.90)    | 7.20<br>(2.68)    | 6.20<br>(1.92)    | 6.6<br>99† | 5.4<br>23† | 0.239 | 5.95<br>(1.60)    | 6.00<br>(1.87)    | 6.00<br>(0.87)    | 6.00<br>(1.08)    | 7.50<br>(2.32)    | 11.00<br>(4.36)   | 5.80<br>(1.92)  | 5.0<br>49*        | 2.3<br>3   | 2.314      |        |
| Lateral Calf SK (mm) | 7.94<br>(1.57)    | 6.38<br>(0.99)    | 6.17<br>(0.98)    | 9.80<br>(4.42)    | 7.90<br>(2.70)    | 6.70<br>(2.08)    | 3.1<br>29  | 3.9<br>09* | 0.280 | 7.05<br>(1.42)    | 7.10<br>(2.16)    | 7.00<br>(0.5)     | 6.38<br>(1.38)    | 8.00<br>(1.95)    | 12.00<br>(4.36)   | 6.10<br>(2.56)  | 3.3<br>57         | 3.5<br>44* | 2.382      |        |
| TUA (cm²)            | 49.52<br>(8.18)   | 46.13<br>(4.23)   | 45.55<br>(7.38)   | 58.94<br>(19.15)  | 47.19<br>(7.89)   | 40.09<br>(3.60)   | 0.2<br>96  | 4.8<br>17* | 1.964 | 48.12<br>(7.05)   | 47.71<br>(6.12)   | 46.08<br>(5.15)   | 45.50<br>(9.68)   | 47.76<br>(8.30)   | 66.46<br>(21.72)  | 44.3<br>4       | 40.16<br>(3.60)   | 0.6<br>43  | 3.7<br>73* | 2.916  |
| UMA (cm²)            | 40.46<br>(7.69)   | 36.85<br>(3.73)   | 36.69<br>(6.83)   | 50.09<br>(19.21)  | 38.68<br>(7.60)   | 31.74<br>(3.54)   | 0.5<br>28  | 4.8<br>12* | 1.977 | 38.80<br>(6.52)   | 38.68<br>(6.50)   | 37.34<br>(4.76)   | 36.72<br>(8.61)   | 38.98<br>(7.87)   | 57.80<br>(21.63)  | 35.6<br>5       | 31.92<br>(4.15)   | 0.8<br>8   | 3.8<br>78* | 3.077* |
| UFA (cm²)            | 9.07<br>(0.95)    | 9.28<br>(0.77)    | 8.86<br>(0.68)    | 8.85<br>(0.90)    | 8.51<br>(1.13)    | 8.35<br>(0.62)    | 3.0<br>59  | 0.5<br>60  | 0.333 | 9.32<br>(0.82)    | 9.03<br>(0.71)    | 8.74<br>(0.56)    | 8.78<br>(1.10)    | 8.78<br>(0.80)    | 8.66<br>(1.22)    | 8.23<br>(0.93)  | 1.1<br>63         | 0.7<br>63  | 0.08       |        |
| UFI (%)              | 18.58<br>(2.39)   | 20.16<br>(1.26)   | 19.73<br>(2.19)   | 16.36<br>(5.30)   | 18.31<br>(3.17)   | 20.95<br>(2.34)   | 1.0<br>21  | 3.1<br>58  | 1.279 | 19.55<br>(1.83)   | 19.24<br>(3.19)   | 19.06<br>(1.42)   | 19.61<br>(2.08)   | 18.69<br>(2.54)   | 14.24<br>(5.74)   | 19.6<br>1       | 20.72<br>(3.50)   | 0.8<br>65  | 2.1<br>19  | 1.755  |
| TCA (cm²)            | 101.59<br>(13.17) | 96.07<br>(9.54)   | 85.55<br>(12.30)  | 112.64<br>(21.13) | 96.73<br>(16.45)  | 84.39<br>(6.17)   | 0.6<br>13  | 7.9<br>84† | 0.735 | 97.08<br>(8.15)   | 100.46<br>(15.56) | 89.02<br>(3.26)   | 89.74<br>(23.43)  | 101.52<br>(12.91) | 115.43<br>(32.40) | 89.8<br>9       | 84.71<br>(6.28)   | 0.4<br>24  | 3.1<br>26* | 0.649  |
| CMA (cm²)            | 76.53<br>(9.91)   | 76.62<br>(9.50)   | 68.3<br>(11.24)   | 78.86<br>(6.42)   | 71.97<br>(9.18)   | 64.72<br>(5.62)   | 0.4<br>14  | 4.5<br>56* | 0.528 | 75.79<br>(8.57)   | 78.30<br>(8.11)   | 68.60<br>(2.19)   | 70.14<br>(18.94)  | 75.67<br>(8.77)   | 74.93<br>(14.60)  | 67.1<br>8       | 66.35<br>(2.65)   | 0.3<br>01  | 1.6<br>74  | 0.084  |
| CFA (cm²)            | 25.06<br>(5.82)   | 19.45<br>(2.72)   | 17.25<br>(2.35)   | 33.78<br>(16.39)  | 24.76<br>(10.01)  | 19.68<br>(6.05)   | 4.3<br>78* | 6.0<br>88† | 0.479 | 21.29<br>(4.78)   | 22.16<br>(8.03)   | 20.41<br>(1.77)   | 19.60<br>(5.56)   | 25.85<br>(7.81)   | 40.49<br>(18.55)  | 22.7<br>1       | 18.36<br>(7.19)   | 3.7<br>42  | 3.6<br>23* | 2.354  |
| CFI (%)              | 24.59<br>(4.09)   | 20.37<br>(3.01)   | 20.40<br>(2.96)   | 28.68<br>(9.24)   | 25.01<br>(6.71)   | 23.16<br>(6.38)   | 4.5<br>57* | 2.8<br>15  | 0.092 | 21.99<br>(4.70)   | 21.59<br>(4.29)   | 22.92<br>(1.42)   | 22.01<br>(3.48)   | 25.25<br>(5.72)   | 33.64<br>(8.30)   | 25.2<br>7       | 21.31<br>(6.62)   | 4.1<br>38  | 1.8<br>37  | 2.158  |
| TTA (cm²)            | 178.96<br>(31.06) | 169.44<br>(31.51) | 163.68<br>(19.65) | 218.99<br>(54.98) | 183.95<br>(41.19) | 162.49<br>(25.59) | 2.3<br>83  | 3.3<br>07* | 1.090 | 178.77<br>(15.24) | 187.92<br>(36.18) | 143.55<br>(39.63) | 152.88<br>(19.52) | 198.13<br>(28.57) | 231.20<br>(73.92) | 191.<br>16      | 150.71<br>(19.04) | 4.8<br>12* | 5.3<br>33† | 0.941  |
| TMA (cm²)            | 162.81<br>(31.32) | 152.84<br>(29.35) | 147.16<br>(18.96) | 203.89<br>(57.86) | 168.06<br>(40.72) | 147.04<br>(25.47) | 2.6<br>29  | 3.3<br>73* | 1.087 | 161.72<br>(14.31) | 171.26<br>(37.52) | 129.32<br>(37.42) | 136.95<br>(18.73) | 181.14<br>(28.29) | 218.82<br>(75.51) | 175.<br>58      | 135.21<br>(20.20) | 5.0<br>70* | 5.3<br>52† | 1.03   |
| TFA (cm²)            | 16.15<br>(1.27)   | 16.60<br>(2.38)   | 16.52<br>(1.09)   | 15.10<br>(3.35)   | 15.89<br>(1.81)   | 15.45<br>(1.34)   | 2.0<br>66  | 0.3<br>14  | 0.033 | 17.05<br>(1.39)   | 16.66<br>(1.42)   | 14.23<br>(2.25)   | 15.93<br>(0.83)   | 16.99<br>(1.37)   | 12.38<br>(1.59)   | 15.5<br>9       | 15.51<br>(1.57)   | 2.1<br>24  | 5.7<br>69† | 4.461‡ |
| TFI (%)              | 9.23<br>(1.47)    | 9.92<br>(0.95)    | 10.19<br>(1.04)   | 7.54<br>(3.25)    | 8.92<br>(1.89)    | 9.70<br>(1.74)    | 3.3<br>02  | 2.4<br>66  | 0.357 | 9.56<br>(0.62)    | 9.18<br>(2.07)    | 10.18<br>(1.46)   | 10.51<br>(0.94)   | 8.69<br>(1.18)    | 6.04<br>(3.21)    | 10.48<br>(1.98) | 6.0<br>12*        | 4.7<br>63† | 1.547      |        |

|                         |                             |                             |                             |                             |                             |                             |                 |            |       |                             |                             |                             |                             |                             |                             |                    |                        |                 |           |            |
|-------------------------|-----------------------------|-----------------------------|-----------------------------|-----------------------------|-----------------------------|-----------------------------|-----------------|------------|-------|-----------------------------|-----------------------------|-----------------------------|-----------------------------|-----------------------------|-----------------------------|--------------------|------------------------|-----------------|-----------|------------|
| %F                      | 10.22<br>(3.38)             | 8.56<br>(3.16)              | 11.16<br>(2.34)             | 12.92<br>(7.18)             | 12.53<br>(3.88)             | 9.78<br>(2.76)              | 1.8<br>36       | 0.3<br>08  | 1.474 | 8.82<br>(2.82)              | 9.91<br>(4.05)              | 11.61<br>(3.69)             | 11.51<br>(1.74)             | 10.38<br>(2.61)             | 17.02<br>(6.26)             | 11.0<br>4          | 10.35<br>(5.20)        | 1.3<br>97       | 1.8<br>94 | 1.912      |
| FM (kg)                 | 7.02<br>(3.11)              | 5.39<br>(2.11)              | 6.40<br>(2.20)              | 9.88<br>(7.18)              | 6.97<br>(2.26)              | 4.87<br>(1.31)              | 0.7<br>41       | 2.3<br>84  | 1.290 | 5.68<br>(2.23)              | 6.65<br>(3.72)              | 7.37<br>(2.81)              | 6.71<br>(2.19)              | 6.03<br>(1.86)              | 13.41<br>(7.36)             | 6.18<br>(2.56)     | 5.20<br>(2.56)         | 0.7<br>93       | 3.4<br>3* | 2.826      |
| FFM (kg)                | 59.88<br>(6.84)             | 57.36<br>(4.37)             | 50.27<br>(9.30)             | 60.22<br>(9.01)             | 48.83<br>(8.12)             | 45.13<br>(4.04)             | 3.5<br>58*      | 9.1<br>66† | 1.267 | 57.88<br>(5.05)             | 58.35<br>(6.98)             | 54.97<br>(3.04)             | 51.54<br>(14.95)            | 52.05<br>(7.67)             | 60.59<br>(15.40)            | 49.8<br>2          | 45.40<br>(4.06)        | 1.3<br>07       | 2.6<br>24 | 0.492      |
| R ( $\Omega$ )          | 503.37<br>(43.66)           | 521.28<br>(49.57)           | 561.00<br>(68.51)           | 521.14<br>(108.10)          | 497.66<br>(115.77)          | 570.42<br>(77.72)           | 0.0<br>02       | 2.0<br>32  | 0.263 | 518.24<br>(48.29)           | 504.62<br>(26.12)           | 556.60<br>(17.94)           | 543.25<br>(107.1)           | 493.48<br>(116.58)          | 490.90<br>(116.95)          | 564.<br>90         | 589.52<br>(53.56)      | 0.0<br>18       | 1.8<br>04 | 0.448      |
| Xc ( $\Omega$ )         | 58.97<br>(4.27)             | 62.04<br>(5.20)             | 62.63<br>(8.41)             | 66.20<br>(12.54)            | 59.90<br>(7.78)             | 60.98<br>(4.83)             | 0.2<br>29       | 0.1<br>59  | 1.677 | 60.10<br>(4.21)             | 57.70<br>(5.54)             | 64.97<br>(3.97)             | 64.58<br>(9.25)             | 63.18<br>(6.06)             | 68.30<br>(16.97)            | 63.5<br>0          | 57.58<br>(4.83)        | 0.2<br>2        | 0.2<br>22 | 2.3        |
| PA                      | 6.72<br>(0.53)              | 6.83<br>(0.58)              | 6.53<br>(0.66)              | 7.70<br>(3.26)              | 7.40<br>(2.93)              | 6.16<br>(0.63)              | 0.5<br>19       | 0.9<br>60  | 0.522 | 6.67<br>(0.55)              | 6.70<br>(0.58)              | 6.67<br>(0.58)              | 6.85<br>(0.82)              | 7.73<br>(2.43)              | 8.50<br>(4.18)              | 6.40               | 5.60<br>(0.47)         | 0.2<br>91       | 1.2<br>89 | 1.609      |
| R/H<br>( $\Omega$ /cm)  | 280.19<br>(27.70)           | 303.69<br>(28.04)           | 341.58<br>(62.26)           | 292.63<br>(59.33)           | 297.16<br>(69.83)           | 348.40<br>(42.13)           | 0.0<br>72       | 4.8<br>19* | 0.132 | 291.72<br>(29.33)           | 294.37<br>(21.22)           | 325.23<br>(12.42)           | 336.06<br>(93.64)           | 295.44<br>(70.47)           | 284.74<br>(80.61)           | 336.<br>45         | 345.52<br>(24.30)      | 0.0<br>33       | 2.1<br>89 | 0.058      |
| Xc/H<br>( $\Omega$ /cm) | 32.82<br>(2.85)             | 36.18<br>(3.39)             | 38.09<br>(6.69)             | 37.20<br>(7.02)             | 35.72<br>(4.52)             | 37.27<br>(2.50)             | 0.4<br>55       | 1.0<br>18  | 1.234 | 33.83<br>(2.60)             | 33.65<br>(3.59)             | 37.95<br>(2.11)             | 39.80<br>(8.35)             | 37.73<br>(2.77)             | 39.31<br>(9.49)             | 37.8<br>2          | 33.76<br>(2.35)        | 0.2<br>34       | 0.2<br>41 | 3.166<br>* |
| Yo-Yo IRT               | 2606.6<br>7<br>(471.54<br>) | 2542.5<br>0<br>(784.52<br>) | 2255.0<br>0<br>(343.85<br>) | 1480.0<br>0<br>(613.84<br>) | 1480.0<br>0<br>(446.62<br>) | 2104.0<br>0<br>(385.33<br>) | 14.<br>100<br>+ | 0.2<br>32  | 2.160 | 2466.6<br>7<br>(587.88<br>) | 2665.0<br>0<br>(644.02<br>) | 2200.0<br>0<br>(226.27<br>) | 2580.0<br>0<br>(927.15<br>) | 1936.0<br>0<br>(294.75<br>) | 1413.3<br>3<br>(938.37<br>) | 1504.0<br>0<br>.00 | 1504.0<br>(398.60<br>) | 6.7<br>96*      | 0.2<br>41 | 1.3        |
| CMJ (cm)                | 37.10<br>(6.29)             | 35.95<br>(5.87)             | 36.73<br>(7.33)             | 29.16<br>(6.04)             | 28.76<br>(4.34)             | 27.80<br>(3.92)             | 16.<br>667<br>+ | 0.0<br>80  | 0.064 | 36.40<br>(7.29)             | 36.74<br>(2.08)             | 39.17<br>(10.16)            | 35.08<br>(3.96)             | 31.22<br>(1.37)             | 25.87<br>(8.49)             | 30.4<br>0          | 26.66<br>(3.50)        | 12.<br>822<br>+ | 0.7<br>6  | 0.45       |
| Sprint 15<br>meters (s) | 2.43<br>(0.14)              | 2.42<br>(0.10)              | 2.37<br>(0.11)              | 2.77<br>(0.15)              | 2.75<br>(0.17)              | 2.77<br>(0.09)              | 70.<br>864<br>+ | 0.1<br>50  | 0.302 | 2.44<br>(0.12)              | 2.37<br>(0.03)              | 2.39<br>(0.23)              | 2.41<br>(0.09)              | 2.69<br>(0.09)              | 2.86<br>(0.15)              | 2.69               | 2.81<br>(0.14)         | 55.<br>565<br>+ | 0.5<br>37 | 1.921      |
| RSA (s)                 | 5.67<br>(0.21)              | 5.71<br>(0.20)              | 5.68<br>(0.22)              | 6.10<br>(0.07)              | 6.30<br>(0.23)              | 6.17<br>(0.25)              | 33.<br>834<br>+ | 0.6<br>71  | 0.247 | 5.69<br>(0.19)              | 5.71<br>(0.11)              | 5.62<br>(0.37)              | 5.73<br>(0.23)              | 6.22<br>(0.22)              | 6.14<br>(0.02)              | 5.88               | 6.29<br>(0.24)         | 22.<br>497<br>+ | 1.0<br>65 | 0.408      |

Note: E, early; OT, on time; L, late; Q1, quartile one; Q2, quartile two; Q3, quartile three; Q4, quartile four; Bo, Bologna F.C.; Ru, Russi; S. U.; MS, maturity status; RAE, relative age effect; SD, standard deviation; F, Snedecor-Fischer statistic test; BMI, body mass index; circ., circumference; SK, skinfold thickness; TUA, total upper area; UMA, upper muscle area; UFA, upper-fat area; UFI, upper-fat index; TCA, total calf area; CMA, calf mass area; CFA, calf fat area; CFI, calf fat index; TTA, total thigh area; TMA, thigh mass area; TFA, thigh fat area; TFI, thigh fat index; %F, fat percentage; FM, fat mass; FFM, fat-free mass; R, resistance; Xc, reactance; PA, phase angle; CMJ, counter-movement jump; RSA, repeated sprint ability; \*, p-value  $\leq 0.05$ ; †, p-value  $\leq 0.01$ ; ‡, p-value  $\leq 0.001$ .
