# Supplementary material for: Maturation Selection Biases and Relative Age Effect in Italian Soccer Players of Different Levels
Source: MDPI journal article supplement (doi:10.3390/biology11111559), 2022-10-24
Supplement: s1 [file s1]

**Table S3.** Variables mean comparisons and interaction effects of Maturity Status, Teams and RAE in U14 soccer players.

|                                 | U14 Bologna      |                  |                  | U14 Russi        |                 |                  |                 |                 |                  | U14 Bologna      |                  |                  |             | U14 Russi        |                 |                  |             |                 |                 |                   |
|---------------------------------|------------------|------------------|------------------|------------------|-----------------|------------------|-----------------|-----------------|------------------|------------------|------------------|------------------|-------------|------------------|-----------------|------------------|-------------|-----------------|-----------------|-------------------|
|                                 | E<br>(n=9)       | OT<br>(n=14)     | L<br>(n=7)       | E<br>(n=6)       | OT<br>(n=9)     | L<br>(n=6)       | Bo<br>-<br>Ru   | M<br>S          | tea<br>ms*<br>MS | Q1<br>(n=17<br>) | Q2<br>(n=6)      | Q3<br>(n=6)      | Q4<br>(n=1) | Q1<br>(n=6)      | Q2<br>(n=6)     | Q3<br>(n=6)      | Q4<br>(n=1) | Bo<br>-<br>Ru   | R<br>A<br>E     | team<br>s*RA<br>E |
|                                 | Mean<br>(± SD)   | Mean<br>(± SD)   | Mean<br>(± SD)   | Mean<br>(± SD)   | Mean<br>(± SD)  | Mean<br>(± SD)   | F<br>(1,<br>47) | F<br>(2,<br>46) | F (5,<br>43)     | Mean<br>(± SD)   | Mean<br>(± SD)   | Mean<br>(± SD)   | Me<br>an    | Mean<br>(± SD)   | Mean<br>(± SD)  | Mean<br>(± SD)   | Me<br>an    | F<br>(1,<br>47) | F<br>(3,<br>45) | F (7,<br>41)      |
| Weight<br>(Kg)                  | 62.00<br>(4.86)  | 53.04<br>(6.57)  | 45.89<br>(4.31)  | 61.92<br>(10.21) | 54.44<br>(5.82) | 39.92<br>(5.40)  | 0.7<br>05       | 31.<br>591<br>+ | 1.549            | 54.38<br>(8.44)  | 49.67<br>(7.45)  | 53.17<br>(8.16)  | 48.0<br>0   | 57.75<br>(7.21)  | 13.63<br>(7.21) | 47.08<br>(10.66) | 38.5<br>0   | 0.3<br>3        | 2.0<br>89       | 0.988             |
| Height<br>(cm)                  | 175.66<br>(7.68) | 165.99<br>(4.15) | 158.22<br>(5.18) | 170.37<br>(5.37) | 160.37<br>(4.9) | 152.33<br>(3.60) | 13.<br>821<br>+ | 40.<br>438<br>+ | 0.012            | 166.92<br>(8.71) | 165.72<br>(8.81) | 164.25<br>(8.00) | 160.<br>00  | 166.19<br>(7.87) | 4.83<br>(7.87)  | 159.55<br>(8.12) | 146.<br>60  | 3.8<br>87       | 2.4<br>56       | 0.78              |
| Trunk<br>Height<br>(cm)         | 90.73<br>(2.68)  | 84.06<br>(2.07)  | 79.44<br>(2.88)  | 89.05<br>(2.24)  | 81.89<br>(2.44) | 77.12<br>(2.06)  | 8.6<br>07+      | 80.<br>241<br>+ | 0.069            | 85.36<br>(5.14)  | 83.90<br>(4.64)  | 81.62<br>(3.77)  | 82.8<br>0   | 85.36<br>(5.03)  | 3.37<br>(5.03)  | 80.98<br>(5.72)  | 75.6<br>0   | 1.5<br>49       | 2.5<br>38       | 0.433             |
| Leg length<br>(cm)              | 84.93<br>(7.65)  | 81.92<br>(3.30)  | 78.78<br>(3.67)  | 81.32<br>(3.47)  | 78.48<br>(2.84) | 75.22<br>(3.41)  | 8.4<br>11+      | 7.3<br>73+      | 0.002            | 81.56<br>(5.59)  | 81.82<br>(4.99)  | 82.63<br>(4.51)  | 77.2<br>0   | 80.83<br>(3.29)  | 2.85<br>(3.29)  | 78.57<br>(2.97)  | 71.0<br>0   | 4.7<br>69*      | 1.8<br>85       | 0.952             |
| BMI<br>(kg/m <sup>2</sup> )     | 20.09<br>(0.84)  | 19.19<br>(1.62)  | 18.32<br>(1.41)  | 21.38<br>(3.93)  | 21.20<br>(2.44) | 17.20<br>(2.17)  | 1.3<br>7        | 8.1<br>29+      | 2.448            | 19.38<br>(1.34)  | 17.99<br>(0.77)  | 19.66<br>(2.21)  | 18.7<br>5   | 20.93<br>(2.63)  | 4.20<br>(2.63)  | 18.34<br>(3.10)  | 17.9<br>1   | 0.4<br>08       | 0.8<br>5        | 1.969             |
| Relaxed<br>arm circ.<br>(cm)    | 24.29<br>(1.00)  | 23.06<br>(2.10)  | 21.71<br>(1.57)  | 25.28<br>(2.72)  | 24.97<br>(2.46) | 21.57<br>(2.30)  | 2.2<br>88       | 8.8<br>75+      | 1.06             | 23.39<br>(1.99)  | 21.95<br>(1.85)  | 22.92<br>(1.85)  | 21.3<br>0   | 24.64<br>(2.39)  | 3.28<br>(2.39)  | 23.13<br>(3.33)  | 21.6<br>0   | 1.2<br>53       | 1.0<br>01       | 0.609             |
| Contracted<br>arm circ.<br>(cm) | 26.76<br>(1.45)  | 25.28<br>(1.96)  | 23.61<br>(1.90)  | 27.38<br>(2.66)  | 27.42<br>(3.17) | 22.82<br>(2.37)  | 0.9<br>69       | 11.<br>68+      | 1.82             | 25.58<br>(2.28)  | 24.08<br>(1.27)  | 25.12<br>(2.34)  | 23.6<br>0   | 27.26<br>(3.43)  | 3.41<br>(3.43)  | 24.75<br>(3.48)  | 22.8<br>0   | 0.3<br>87       | 1.4<br>77       | 0.653             |
| Calf circ.<br>(cm)              | 37.36<br>(8.09)  | 33.33<br>(1.87)  | 32.39<br>(2.09)  | 35.48<br>(2.39)  | 34.69<br>(1.7)  | 30.40<br>(2.33)  | 0.6<br>63       | 7.0<br>41+      | 1.346            | 33.49<br>(1.65)  | 35.78<br>(9.81)  | 34.02<br>(2.3)   | 31.4<br>0   | 35.23<br>(1.80)  | 3.11<br>(1.80)  | 31.98<br>(3.38)  | 30.9<br>0   | 0.1<br>7        | 0.8<br>17       | 0.839             |
| Thigh circ.<br>(cm)             | 47.53<br>(2.38)  | 45.31<br>(3.89)  | 43.07<br>(2.96)  | 50.88<br>(4.84)  | 49.20<br>(4.39) | 41.93<br>(4.83)  | 3.1<br>66       | 11.<br>007<br>+ | 1.954            | 45.69<br>(3.56)  | 42.65<br>(3.15)  | 46.45<br>(3.79)  | 43.3<br>0   | 49.76<br>(5.08)  | 6.09<br>(5.08)  | 44.80<br>(6.45)  | 44.7<br>0   | 1.4<br>17       | 1.1<br>28       | 1.419             |
| Humeral<br>diameter<br>(mm)     | 6.64<br>(0.38)   | 6.49<br>(0.22)   | 6.11<br>(0.22)   | 6.80<br>(0.38)   | 6.44<br>(0.27)  | 6.07<br>(0.33)   | 0.0<br>64       | 16.<br>731<br>+ | 0.592            | 6.42<br>(0.37)   | 6.52<br>(0.33)   | 6.32<br>(0.21)   | 6.20        | 6.65<br>(0.33)   | 0.47<br>(0.33)  | 6.28<br>(0.44)   | 6.10        | 0.0<br>08       | 1.4<br>87       | 0.788             |
| Femoral<br>diameter<br>(mm)     | 9.49<br>(0.45)   | 9.41<br>(0.40)   | 8.89<br>(0.65)   | 9.78<br>(0.39)   | 9.41<br>(0.35)  | 8.83<br>(0.56)   | 0.3<br>55       | 10.<br>118<br>+ | 0.559            | 9.26<br>(0.62)   | 9.27<br>(0.41)   | 9.38<br>(0.50)   | 8.80        | 9.49<br>(0.30)   | 0.70<br>(0.30)  | 9.33<br>(0.68)   | 8.60        | 0.0<br>01       | 0.9<br>04       | 0.221             |
| Triceps SK<br>(mm)              | 5.86<br>(1.60)   | 7.21<br>(1.40)   | 7.44<br>(2.52)   | 9.17<br>(2.48)   | 10.00<br>(4.35) | 10.00<br>(3.16)  | 13.<br>511<br>+ | 0.8<br>7        | 0.071            | 6.62<br>(1.75)   | 7.50<br>(1.38)   | 7.42<br>(2.80)   | 7.00        | 9.56<br>(3.16)   | 3.53<br>(3.16)  | 10.83<br>(3.87)  | 13.0<br>0   | 8.7<br>28+      | 0.7<br>46       | 0.792             |

|                            |                   |                   |                   |                   |                   |                   |                 |                 |       |                   |                   |                   |            |                   |                  |                   |            |            |            |       |
|----------------------------|-------------------|-------------------|-------------------|-------------------|-------------------|-------------------|-----------------|-----------------|-------|-------------------|-------------------|-------------------|------------|-------------------|------------------|-------------------|------------|------------|------------|-------|
| Biceps SK<br>(mm)          | 4.36<br>(1.25)    | 4.43<br>(1.24)    | 4.89<br>(1.60)    | 5.08<br>(2.06)    | 7.17<br>(3.73)    | 5.67<br>(2.16)    | 5.1<br>13*      | 1.0<br>48       | 1.31  | 4.71<br>(1.43)    | 4.17<br>(0.98)    | 4.58<br>(1.56)    | 4.00       | 5.69<br>(3.47)    | 2.82<br>(3.47)   | 6.50<br>(3.03)    | 7.00       | 4.3<br>70* | 0.0<br>73  | 0.264 |
| Subscapula<br>r SK (mm)    | 6.57<br>(0.73)    | 6.21<br>(1.09)    | 5.61<br>(0.89)    | 8.50<br>(5.17)    | 9.44<br>(4.16)    | 6.17<br>(1.03)    | 6.3<br>20*      | 2.5<br>98       | 1.168 | 6.18<br>(0.92)    | 5.92<br>(0.66)    | 6.33<br>(1.51)    | 5.00       | 7.88<br>(3.36)    | 5.75<br>(3.36)   | 7.58<br>(3.26)    | 6.50       | 3.1<br>25  | 0.4<br>26  | 0.503 |
| Supraspina<br>l SK (mm)    | 4.86<br>(0.85)    | 5.00<br>(1.00)    | 4.83<br>(1.48)    | 8.67<br>(5.71)    | 8.44<br>(3.50)    | 6.00<br>(2.81)    | 12.<br>033<br>+ | 1.1<br>63       | 0.99  | 4.88<br>(1.05)    | 4.75<br>(0.88)    | 5.10<br>(1.71)    | 5.50       | 7.56<br>(3.37)    | 6.12<br>(3.37)   | 7.17<br>(3.27)    | 8.50       | 5.6<br>01* | 0.1<br>29  | 0.208 |
| Suprailiac<br>SK (mm)      | 8.07<br>(1.54)    | 7.96<br>(1.99)    | 7.78<br>(2.43)    | 11.08<br>(4.54)   | 11.94<br>(5.34)   | 9.17<br>(3.49)    | 8.1<br>34†      | 0.8<br>7        | 0.651 | 7.97<br>(2.00)    | 7.00<br>(1.45)    | 8.92<br>(2.31)    | 7.00       | 10.63<br>(4.24)   | 6.71<br>(4.24)   | 11.58<br>(3.53)   | 9.00       | 3.7<br>05  | 0.4<br>22  | 0.111 |
| Thigh SK<br>(mm)           | 8.29<br>(1.11)    | 9.29<br>(1.89)    | 9.94<br>(2.60)    | 11.42<br>(4.74)   | 13.33<br>(4.90)   | 10.75<br>(4.59)   | 7.1<br>99†      | 0.8<br>3        | 1.007 | 9.29<br>(1.58)    | 9.17<br>(1.33)    | 9.58<br>(3.58)    | 7.00       | 11.38<br>(4.03)   | 5.65<br>(4.03)   | 12.67<br>(5.60)   | 13.0<br>0  | 5.5<br>72* | 0.1<br>48  | 0.217 |
| Medial<br>Calf SK<br>(mm)  | 6.36<br>(1.11)    | 6.75<br>(2.01)    | 7.33<br>(2.59)    | 7.92<br>(3.72)    | 9.50<br>(3.39)    | 6.83<br>(2.32)    | 2.8<br>16       | 0.9<br>4        | 1.715 | 7.00<br>(1.88)    | 6.75<br>(1.08)    | 6.75<br>(3.19)    | 5.00       | 7.63<br>(2.99)    | 4.29<br>(2.99)   | 8.33<br>(3.27)    | 9.00       | 3.3<br>63  | 0.1<br>33  | 0.398 |
| Lateral<br>Calf SK<br>(mm) | 7.14<br>(0.90)    | 7.79<br>(2.16)    | 7.94<br>(3.15)    | 9.00<br>(3.85)    | 10.39<br>(3.43)   | 7.92<br>(2.29)    | 3.3<br>87       | 0.9<br>68       | 1.012 | 7.85<br>(1.92)    | 7.33<br>(1.40)    | 7.83<br>(3.87)    | 6.00       | 9.06<br>(2.98)    | 4.39<br>(2.98)   | 9.33<br>(3.39)    | 9.00       | 2.6<br>6   | 0.0<br>81  | 0.124 |
| TUA (cm <sup>2</sup> )     | 47.03<br>(3.91)   | 42.65<br>(7.78)   | 37.70<br>(5.62)   | 51.39<br>(11.68)  | 50.06<br>(9.91)   | 37.38<br>(8.26)   | 2.6<br>04       | 8.0<br>98†      | 0.992 | 43.87<br>(7.43)   | 38.59<br>(6.52)   | 42.04<br>(6.66)   | 36.1<br>2  | 48.73<br>(9.63)   | 13.58<br>(9.63)  | 43.34<br>(12.32)  | 37.1<br>5  | 1.3<br>33  | 0.9<br>29  | 0.581 |
| UMA (cm <sup>2</sup> )     | 37.68<br>(3.8)    | 34.24<br>(7.02)   | 29.92<br>(5.62)   | 42.91<br>(11.70)  | 42.07<br>(10.62)  | 30.47<br>(8.21)   | 3.7<br>23       | 6.3<br>43†      | 0.894 | 35.13<br>(6.71)   | 30.69<br>(5.78)   | 33.80<br>(6.59)   | 28.3<br>2  | 40.63<br>(9.84)   | 13.68<br>(9.84)  | 36.25<br>(12.43)  | 31.0<br>9  | 1.8<br>88  | 0.6<br>74  | 0.396 |
| UFA (cm <sup>2</sup> )     | 9.35<br>(0.49)    | 8.41<br>(0.90)    | 7.78<br>(0.55)    | 8.47<br>(0.46)    | 7.99<br>(0.95)    | 6.92<br>(0.78)    | 10.<br>565<br>+ | 14.<br>635<br>+ | 0.538 | 8.74<br>(0.95)    | 7.90<br>(0.85)    | 8.24<br>(0.65)    | 7.80       | 8.10<br>(0.77)    | 0.54<br>(0.77)   | 7.09<br>(0.89)    | 6.06       | 4.4<br>35* | 3.5<br>14* | 2.709 |
| UFI (%)                    | 19.97<br>(1.71)   | 20.02<br>(2.14)   | 20.99<br>(3.07)   | 17.05<br>(3.04)   | 16.74<br>(4.59)   | 19.11<br>(3.86)   | 8.6<br>23†      | 1.3<br>74       | 0.221 | 20.19<br>(2.15)   | 20.69<br>(1.90)   | 20.02<br>(3.55)   | 21.6<br>0  | 17.18<br>(3.52)   | 4.44<br>(3.52)   | 17.49<br>(4.93)   | 16.3<br>1  | 5.8<br>16* | 0.1<br>4   | 0.115 |
| TCA (cm <sup>2</sup> )     | 115.57<br>(57.74) | 88.70<br>(9.99)   | 83.83<br>(10.87)  | 100.62<br>(13.71) | 96.01<br>(9.42)   | 73.94<br>(11.27)  | 0.7<br>32       | 5.3<br>32†      | 1.111 | 89.52<br>(8.69)   | 108.34<br>(67.89) | 92.48<br>(12.24)  | 78.5<br>0  | 99.02<br>(9.98)   | 17.28<br>(9.98)  | 82.2<br>(16.83)   | 76.0<br>2  | 0.2<br>09  | 0.7<br>52  | 0.784 |
| CMA (cm <sup>2</sup> )     | 91.57<br>(50.72)  | 66.02<br>(6.57)   | 60.94<br>(9.42)   | 72.70<br>(8.73)   | 64.54<br>(6.08)   | 53.05<br>(6.64)   | 2.6<br>5        | 5.7<br>04†      | 0.785 | 66.41<br>(7.86)   | 84.53<br>(59.96)  | 69.24<br>(9.00)   | 62.1<br>8  | 71.79<br>(8.23)   | 4.99<br>(8.23)   | 55.95<br>(9.05)   | 50.7<br>5  | 1.2<br>71  | 0.7<br>05  | 1.159 |
| CFA (cm <sup>2</sup> )     | 24.00<br>(7.47)   | 22.67<br>(6.74)   | 22.89<br>(8.99)   | 27.92<br>(13.28)  | 31.47<br>(11.04)  | 20.90<br>(7.11)   | 1.8<br>25       | 1.4<br>77       | 1.551 | 23.11<br>(5.84)   | 23.80<br>(8.46)   | 23.24<br>(11.2)   | 16.3<br>2  | 27.22<br>(9.82)   | 15.24<br>(9.82)  | 26.25<br>(11.34)  | 25.2<br>7  | 1.7<br>43  | 0.2<br>24  | 0.072 |
| CFI (%)                    | 21.83<br>(3.48)   | 25.26<br>(5.73)   | 27.12<br>(8.29)   | 27.10<br>(9.47)   | 32.22<br>(8.99)   | 27.82<br>(6.18)   | 4.1<br>96*      | 1.4<br>42       | 0.834 | 25.8<br>(5.78)    | 24.00<br>(5.18)   | 24.51<br>(9.56)   | 20.7<br>9  | 27.19<br>(7.89)   | 10.82<br>(7.89)  | 31.02<br>(7.83)   | 33.2<br>4  | 4.4<br>15* | 0.0<br>77  | 0.629 |
| TTA (cm <sup>2</sup> )     | 180.24<br>(18.53) | 164.61<br>(28.51) | 148.29<br>(20.89) | 207.70<br>(41.06) | 194.09<br>(36.52) | 141.55<br>(32.54) | 3.6<br>35       | 9.9<br>51†      | 1.784 | 167.19<br>(26.25) | 145.48<br>(21.92) | 172.74<br>(27.78) | 149.<br>27 | 198.96<br>(41.33) | 49.94<br>(41.33) | 162.56<br>(44.43) | 159.<br>08 | 1.5<br>14  | 1.0<br>75  | 1.314 |
| TMA (cm <sup>2</sup> )     | 163.15<br>(17.23) | 149.09<br>(27.76) | 134.02<br>(21.26) | 192.06<br>(42.82) | 180.44<br>(38.35) | 128.35<br>(33.65) | 4.1<br>45*      | 8.7<br>4†       | 1.785 | 151.49<br>(25.07) | 130.80<br>(21.14) | 157.07<br>(27.59) | 132.<br>93 | 183.60<br>(42.11) | 52.08<br>(42.11) | 149.87<br>(45.67) | 146.<br>26 | 1.8<br>14  | 0.9<br>28  | 1.153 |
| TFA (cm <sup>2</sup> )     | 17.09<br>(1.48)   | 15.52<br>(1.40)   | 14.27<br>(1.38)   | 15.63<br>(3.23)   | 13.65<br>(2.96)   | 13.20<br>(2.15)   | 5.6<br>53*      | 5.5<br>21†      | 0.158 | 15.69<br>(1.67)   | 14.69<br>(1.12)   | 15.67<br>(2.39)   | 16.3<br>5  | 15.36<br>(2.78)   | 2.89<br>(2.78)   | 12.69<br>(2.97)   | 12.8<br>3  | 3.8<br>89  | 1.2<br>13  | 1.117 |
| TFI (%)                    | 9.50<br>(0.45)    | 9.61<br>(1.34)    | 9.79<br>(1.53)    | 7.83<br>(2.13)    | 7.35<br>(2.33)    | 9.84<br>(2.88)    | 5.8<br>16*      | 2.4<br>95       | 1.774 | 9.49<br>(0.94)    | 10.21<br>(1.05)   | 9.26<br>(1.95)    | 10.9<br>5  | 8.02<br>(1.94)    | 2.98<br>(1.94)   | 8.55<br>(3.44)    | 8.06       | 4.5<br>97* | 0.1<br>66  | 0.33  |
| %F                         | 9.20<br>(1.13)    | 12.02<br>(2.34)   | 12.47<br>(3.31)   | 13.72<br>(6.01)   | 17.59<br>(7.27)   | 15.68<br>(3.44)   | 12.<br>457<br>+ | 2.5<br>38       | 0.329 | 10.90<br>(2.46)   | 11.62<br>(1.97)   | 13.06<br>(3.96)   | 11.6<br>7  | 14.65<br>(6.40)   | 7.07<br>(6.4)    | 16.75<br>(5.55)   | 18.8<br>5  | 6.3<br>94* | 0.6<br>8   | 0.115 |

|                         |                             |                             |                             |                             |                        |                        |                 |                 |            |                      |                      |                      |             |                             |                        |                        |            |                 |                |        |
|-------------------------|-----------------------------|-----------------------------|-----------------------------|-----------------------------|------------------------|------------------------|-----------------|-----------------|------------|----------------------|----------------------|----------------------|-------------|-----------------------------|------------------------|------------------------|------------|-----------------|----------------|--------|
| FM (kg)                 | 5.73<br>(1.02)              | 6.44<br>(1.81)              | 5.76<br>(1.85)              | 8.86<br>(5.64)              | 9.87<br>(4.86)         | 6.34<br>(2.04)         | 6.7<br>08†      | 1.9<br>44       | 0.971      | 5.86<br>(1.39)       | 5.75<br>(1.09)       | 7.04<br>(2.68)       | 5.60        | 8.50<br>(4.13)              | 6.27<br>(4.13)         | 8.14<br>(4.28)         | 7.26       | 2.5<br>22       | 0.1<br>01      | 0.29   |
| FFM (kg)                | 56.27<br>(4.07)             | 46.60<br>(5.34)             | 40.13<br>(3.65)             | 53.06<br>(6.33)             | 44.58<br>(3.12)        | 33.58<br>(3.93)        | 8.7<br>18†      | 52.<br>157<br>† | 1.1        | 48.52<br>(8.02)      | 43.92<br>(6.87)      | 46.13<br>(6.61)      | 42.4<br>0   | 49.25<br>(6.98)             | 7.95<br>(6.98)         | 38.94<br>(7.87)        | 31.2<br>4  | 1.9<br>62       | 3.1<br>58*     | 1.009  |
| R (Ω)                   | 501.13<br>(36.72)           | 546.78<br>(58.73)           | 575.67<br>(60.91)           | 508<br>(40.74)              | 553.36<br>(33.67)      | 673.07<br>(73.38)      | 5.6<br>6*       | 003<br>†        | 3.716<br>* | 527.78<br>(65.09)    | 575.15<br>(36.63)    | 548.98<br>(50.68)    | 626.<br>70  | 541.16<br>(57.90)           | 58.85<br>(57.90)       | 631.43<br>(94.06)      | 691.<br>80 | 1.4<br>47       | 3.7<br>29*     | 1.759  |
| Xc (Ω)                  | 57.61<br>(6.36)             | 58.47<br>(6.33)             | 60.07<br>(5.99)             | 57.42<br>(5.26)             | 59.02<br>(5.53)        | 67.28<br>(12.50)       | 1.5<br>12       | 3.1<br>27       | 1.259      | 58.22<br>(5.51)      | 58.67<br>(5.34)      | 58.67<br>(8.27)      | 68.8<br>0   | 58.85<br>(6.45)             | 7.08<br>(6.45)         | 64.82<br>(12.77)       | 64.5<br>0  | 0.0<br>59       | 1.1<br>27      | 0.539  |
| PA                      | 6.56<br>(0.53)              | 6.12<br>(0.46)              | 5.97<br>(0.35)              | 6.45<br>(0.34)              | 6.11<br>(0.66)         | 5.82<br>(1.17)         | 0.2<br>55       | 3.5<br>7*       | 0.064      | 6.32<br>(0.33)       | 5.82<br>(0.39)       | 6.10<br>(0.79)       | 6.30        | 6.24<br>(0.54)              | 0.64<br>(0.54)         | 5.98<br>(1.19)         | 5.30       | 0.5<br>3        | 0.7<br>76      | 0.973  |
| R/H<br>(Ω/cm)           | 285.31<br>(17.56)           | 330.18<br>(41.51)           | 364.92<br>(48.32)           | 298.24<br>(23.31)           | 345.62<br>(27.78)      | 441.93<br>(48.05)      | 10.<br>243      | 30.<br>848<br>† | 3.538<br>* | 318.06<br>(52.28)    | 348.57<br>(36.31)    | 335.64<br>(42.61)    | 391.<br>69  | 327.33<br>(48.53)           | 43.96<br>(48.53)       | 398.39<br>(74.95)      | 471.<br>90 | 2.9<br>38       | 4.0<br>03<br>† | 1.198  |
| Xc/H<br>(Ω/cm)          | 32.81<br>(3.45)             | 35.29<br>(4.35)             | 38.08<br>(4.79)             | 33.69<br>(2.79)             | 36.88<br>(4.09)        | 44.18<br>(8.27)        | 4.2<br>21*      | 9.8<br>2†       | 1.313      | 35.03<br>(4.49)      | 35.57<br>(4.45)      | 35.77<br>(5.12)      | 43.0<br>0   | 35.52<br>(4.67)             | 5.05<br>(4.67)         | 40.88<br>(9.50)        | 44.0<br>0  | 0.8<br>8        | 1.8<br>81      | 0.468  |
| Yo-Yo IRT<br>(s)        | 2283.3<br>3<br>(548.22<br>) | 2445.0<br>0<br>(427.94<br>) | 2320.0<br>0<br>(693.04<br>) | 1135.0<br>0<br>(671.19<br>) | 602.22<br>(320.0<br>7) | 844.00<br>(402.5<br>9) | 82.<br>904<br>† | 0.4<br>32       | 1.604      | 2316<br>(560.9<br>8) | 2572<br>(345.1<br>4) | 2240<br>(632.9<br>6) | 2880<br>.00 | 1062.8<br>6<br>(581.08<br>) | 284.44<br>(581.0<br>8) | 572.00<br>(280.5<br>7) | 0.00       | 0               | 1.1<br>09      | 1.662  |
| CMJ (cm)                | 34.44<br>(2.53)             | 32.63<br>(2.64)             | 31.68<br>(3.52)             | 29.95<br>(4.75)             | 28.22<br>(6.83)        | 25.47<br>(6.89)        | 14.<br>022<br>† | 2.1<br>2        | 0.19       | 33.16<br>(3.41)      | 31.47<br>(2.49)      | 33.43<br>(1.92)      | 29.9<br>0   | 30.23<br>(5.50)             | 5.54<br>(5.50)         | 24.52<br>(7.46)        | 23.2<br>0  | 7.5<br>39†      | 1.4<br>77      | 1.428  |
| Sprint 15<br>meters (s) | 2.45<br>(0.09)              | 2.52<br>(0.09)              | 2.53<br>(0.08)              | 2.82<br>(0.22)              | 2.90<br>(0.22)         | 3.08<br>(0.22)         | 86.<br>607<br>† | 4.0<br>29*      | 1.698      | 2.50<br>(0.08)       | 2.57<br>(0.03)       | 2.45<br>(0.14)       | 2.54        | 2.81<br>(0.18)              | 3.19<br>(0.18)         | 3.16<br>(0.17)         | 3.19       | 77.<br>642<br>† | 4.1<br>47†     | 7.101† |
| RSA (s)                 | 5.77<br>(0.20)              | 5.87<br>(0.23)              | 5.84<br>(0.10)              | 6.47<br>(0.35)              | 6.61<br>(0.50)         | 6.82<br>(0.60)         | 52.<br>180<br>† | 0.9<br>82       | 0.658      | 5.84<br>(0.11)       | 5.98<br>(0.14)       | 5.75<br>(0.32)       | 5.71        | 6.42<br>(0.41)              | 6.52<br>(0.35)         | 7.08<br>(0.52)         | 7.10       | 15.<br>213<br>† | 3.1<br>79*     | 6.256† |

Note: E, early; OT, on time; L, late; Q1, quartile one; Q2, quartile two; Q3, quartile three; Q4, quartile four; Bo, Bologna F.C.; Ru, Russi. S. U.; MS, maturity status; RAE, relative age effect; SD, standard deviation; F, Snedecor-Fischer statistic test; BMI, body mass index; circ., circumference; SK, skinfold thickness; TUA, total upper area; UMA, upper muscle area; UFA, upper-fat area; UFI, upper-fat index; TCA, total calf area; CMA, calf mass area; CFA, calf fat area; CFI, calf fat index; TTA, total thigh area; TMA, thigh mass area; TFA, thigh fat area; TFI, thigh fat index; %F, fat percentage; FM, fat mass; FFM, fat-free mass; R, resistance; Xc, reactance; PA, phase angle; CMJ, counter-movement jump; RSA, repeated sprint ability; \*, p-value  $\leq 0.05$ ; †, p-value  $\leq 0.01$ ; ‡, p-value  $\leq 0.001$ .
